# Supplementary material for: Thyroid Hormones Regulate Zebrafish Melanogenesis in a Gender-Specific Manner
Source: PLoS One. 2016 Nov 10;11(11):e0166152. doi: 10.1371/journal.pone.0166152 (PMC5104317; doi:10.1371/journal.pone.0166152)
Supplement: S3 Text — Expression levels of melanophore-related genes after 7 days of T3 treatment according to fish gender as measured by qPCR. See material and method for details. (XLSX) [file pone.0166152.s006.xlsx]

## Sheet: qPCR
		CT Act-1	CT Act-2	M CT Act	CT EF1-1	CT EF1-2	M CT EF1	Geo CT HK
Machos	C_M_01	26.19	25.74	25.965
	C_M_02	26.14	25.68	25.91
	C_M_03	25.43	25.06	25.245
	C_M_04	25.48	24.78	25.13
	C_M_05	25.35	24.97	25.16
	C_M_06	26.02	25.82	25.92
	C_M_07	26.01	25.44	25.725
	C_M_08	26.3	25.91	26.105
	C_M_09	24.81	24.52	24.665
Hembras	C_F_01	26.53	25.94	26.235
	C_F_02	24.35	23.95	24.15
	C_F_03	24.87	24.51	24.69
	C_F_04	24.64	24.56	24.6
	C_F_05	25.49	25.24	25.365
	C_F_06	24.02	23.64	23.83
	C_F_07	25.49	25.42	25.455
	C_F_08	24.62	25.02	24.82
	C_F_09	26.18	25.83	26.005
	C_F_10	25.73	25.61	25.67
Machos	T3_M_01	26.59	26.73	26.66
	T3_M_02	26.17	26.51	26.34
	T3_M_03	24.4	24.48	24.44
	T3_M_04	25.65	25.61	25.63
	T3_M_05	24.78	22.16	23.47
	T3_M_06	26.39	26.26	26.325
	T3_M_07	25.19	25.31	25.25
	T3_M_08	26.44	26.66	26.55
Hembras	T3_F_01	25.9	26.03	25.965
	T3_F_02	25.83	26.62	26.225
	T3_F_03	24.25	25	24.625
	T3_F_04	25.59	25.78	25.685
	T3_F_05	25.83	26.06	25.945
	T3_F_06	24.55	24.82	24.685
	T3_F_07	25.48	25.88	25.68
	T3_F_08	25.9	25.99	25.945
	T3_F_09	25.48	25.83	25.655
	T3_F_10	25.99	26.39	26.19
	Genes de Interes
	Peces	CT ASIP-1	CT ASIP-2	M ASIP	CT dct-1	CT dct-2	M dct	CT foxd3-1	CT foxd3-2	M foxd3	CT Kita-1	CT Kita-2	M Kita	CT Kitb-1	CT Kitb-2	M Kitb	CT MC1R-1	CT MC1R-2	M MC1R
Machos	C_M_01	24.75	24.13	24.44	30.34	29.36	29.85	27.76	26.8	27.28	25.47	24.77	25.12	30.84	30.01	30.425	27.03	26.37	26.7
	C_M_02	25.56	25.37	25.465	32	31.97	31.985	27.55	27.11	27.33	25.24	25.01	25.125	31.69	31.56	31.625	27.61	27.5	27.555
	C_M_03	25.76	25.49	25.625	30.17	29.87	30.02	27.3	27.1	27.2	24.2	23.88	24.04	30.43	29.72	30.075	26.58	26.49	26.535
	C_M_04	25.27	24.98	25.125	31.49	31.41	31.45	26.69	26.38	26.535	25.25	25.03	25.14	31.02	30.62	30.82	26.76	26.5	26.63
	C_M_05	25.16	24.69	24.925	32.66	32.16	32.41	27.57	27.07	27.32	25.57	25.05	25.31	30.96	30.59	30.775	27.69	27.22	27.455
	C_M_06	24.53	24.14	24.335	31.67	31.08	31.375	27.29	26.87	27.08	25.32	24.82	25.07	30.32	29.73	30.025	27.46	27.2	27.33
	C_M_07	23.75	23.4	23.575	32.7	31.01	31.855	27.4	27.18	27.29	25.75	25.34	25.545	32.27	31.77	32.02	27.49	27.12	27.305
	C_M_08	24.92	24.49	24.705	31.3	31.45	31.375	27.62	27.02	27.32	25.63	25.26	25.445	32.44	32.01	32.225	27.51	27.16	27.335
	C_M_09	25.07	24.8	24.935	31.46	31.36	31.41	28.33	27.97	28.15	26.19	25.87	26.03	32.73	32.5	32.615	28.5	28.11	28.305
Hembras	C_F_01	25.89	25.35	25.62	31.91	30.77	31.34	28.01	27.48	27.745	25.84	25.34	25.59	30.3	29.8	30.05	28.11	27.3	27.705
	C_F_02	23.77	23.22	23.495	29.01	28.65	28.83	27.11	26.65	26.88	25.11	24.75	24.93	30.49	30.29	30.39	27.54	27.06	27.3
	C_F_03	23.6	23.44	23.52	29.47	29.48	29.475	26.69	26.53	26.61	24.01	23.88	23.945	29.59	29.35	29.47	26.55	26.34	26.445
	C_F_04	24.45	24.38	24.415	29.75	30.05	29.9	26.6	26.56	26.58	25.43	25.34	25.385	31.03	30.47	30.75	27.24	27.21	27.225
	C_F_05	23.53	23.33	23.43	31.74	31.37	31.555	26.93	26.68	26.805	25.18	24.87	25.025	30.26	30.04	30.15	26.97	26.66	26.815
	C_F_06	24.06	23.99	24.025	28.5	28.25	28.375	27.08	26.83	26.955	26.02	25.89	25.955	30.83	30.77	30.8	27.78	27.47	27.625
	C_F_07	24.05	24	24.025	29.17	29.1	29.135	26.43	26.23	26.33	25.17	25.06	25.115	29.96	29.87	29.915	27.3	27.2	27.25
	C_F_08	23.68	23.57	23.625	31.11	31.05	31.08	26.84	27.02	26.93	25.12	25.01	25.065	29.56	29.69	29.625	27.98	27.95	27.965
	C_F_09	24.82	24.7	24.76	29.3	29.55	29.425	27.25	27.09	27.17	25.93	25.83	25.88	30.49	30.41	30.45	28.36	28.33	28.345
	C_F_10	23.96	23.94	23.95	30.54	30.55	30.545	27.35	27.21	27.28	26.1	25.9	26	31.15	31.46	31.305	27.78	27.67	27.725
Machos	T3_M_01	24.77	24.68	24.725	31.35	31.28	31.315	28.2	28.05	28.125	25.52	25.34	25.43	30.19	29.83	30.01	26.94	26.68	26.81
	T3_M_02	25.09	25.14	25.115	28.28	28.46	28.37	27.57	27.59	27.58	25.34	25.4	25.37	31.1	30.99	31.045	26.46	26.63	26.545
	T3_M_03	24.13	24.02	24.075	30.3	30.43	30.365	27.25	27.24	27.245	25.04	24.87	24.955	31.35	30.93	31.14	26.74	26.77	26.755
	T3_M_04	25.99	25.86	25.925	30.41	30.63	30.52	27.54	27.62	27.58	25.91	25.89	25.9	30.63	30.43	30.53	27.28	26.94	27.11
	T3_M_05	24.54	24.42	24.48	31.04	31.64	31.34	26.48	26.42	26.45	24.83	24.91	24.87	29.43	29.46	29.445	26.49	26.61	26.55
	T3_M_06	25.19	25.2	25.195	31.66	32	31.83	27.27	27.26	27.265	25.76	25.81	25.785	31.47	31.32	31.395	27.43	27.21	27.32
	T3_M_07	25.31	25.39	25.35	30.56	30.31	30.435	26.75	26.83	26.79	24.76	24.92	24.84	31.17	30.91	31.04	25.99	26.02	26.005
	T3_M_08	25.44	25.44	25.44	31.46	31.33	31.395	27.39	27.35	27.37	25.94	25.75	25.845	30.13	30.23	30.18	27.25	27.13	27.19
Hembras	T3_F_01	24.16	24.45	24.305	27.19	27.3	27.245	27.95	28.04	27.995	25.25	25.43	25.34	31.42	31.23	31.325	26.87	27.01	26.94
	T3_F_02	23.19	23.48	23.335	32.39	32.29	32.34	27.59	27.87	27.73	24.15	24.67	24.41	29.41	29.94	29.675	27.94	28.14	28.04
	T3_F_03	24.65	24.6	24.625	28.91	28.68	28.795	26.59	26.74	26.665	24.15	24.37	24.26	29.34	29.57	29.455	27.29	27.4	27.345
	T3_F_04	23.92	24.04	23.98	29.25	29.39	29.32	27.48	27.24	27.36	24.81	25.06	24.935	29.38	29.29	29.335	26.73	26.88	26.805
	T3_F_05	24.72	24.72	24.72	29.98	30.06	30.02	27.59	27.46	27.525	24.84	25.08	24.96	30.53	30.48	30.505	27.25	27.54	27.395
	T3_F_06	25.52	25.67	25.595	28.33	28.5	28.415	26.57	26.59	26.58	24.62	24.85	24.735	30.17	30.26	30.215	27.53	27.74	27.635
	T3_F_07	24.94	24.99	24.965	31.35	31.07	31.21	27.08	27.18	27.13	25	25.14	25.07	30.74	30.61	30.675	26.84	27.13	26.985
	T3_F_08	23.54	23.54	23.54	30.93	31.24	31.085	25.82	25.93	25.875	26.02	25.95	25.985	31.29	30.9	31.095	26.29	26.16	26.225
	T3_F_09	24.73	24.92	24.825	29.33	29.43	29.38	26.2	26.26	26.23	25.38	25.58	25.48	30.53	30.17	30.35	26.09	26.2	26.145
	T3_F_10	25.63	25.82	25.725	28.19	28.34	28.265	28.46	28.45	28.455	24.08	24.23	24.155	30.44	30.13	30.285	27.59	27.7	27.645
	Peces	CT MITFa-1	CT MITFa-2	M MITFa	CT Slc24a5-1	CT Slc24a5-2	M Slc24a5	CT Sox10-1	CT Sox10-2	M Sox10	CT TYR-1	CT TYR-2	M TYR	CT TYRP1a-1	CT TYRP1a-2	M TYRP1a	CT TYRP1b-1	CT TYRP1b-2	M TYRP1b
Machos	C_M_01	27.18	26.48	26.83	28.87	28.45	28.66	26.27	25.68	25.975	27.05	26.28	26.665	28.53	27.96	28.245	26.44	25.64	26.04
	C_M_02	27.61	27.36	27.485	27.94	27.87	27.905	26.28	26.14	26.21	27.14	26.99	27.065	29.72	29.67	29.695	27.21	27.27	27.24
	C_M_03	26.93	26.47	26.7	27.76	27.37	27.565	25.64	25.15	25.395	26.32	25.93	26.125	28.96	28.72	28.84	25.74	25.54	25.64
	C_M_04	27.33	26.97	27.15	28.03	27.78	27.905	25.57	25.24	25.405	26.72	26.39	26.555	29.53	29.22	29.375	26.64	26.41	26.525
	C_M_05	27.55	26.99	27.27	28.16	27.5	27.83	26.28	25.73	26.005	27.19	26.62	26.905	30.15	29.88	30.015	28.44	28.1	28.27
	C_M_06	27.52	27.15	27.335	28.83	28.33	28.58	26.1	25.56	25.83	27.25	26.68	26.965	29.12	28.65	28.885	27.32	26.97	27.145
	C_M_07	27.85	27.51	27.68	29.58	29	29.29	26.24	25.9	26.07	27.66	27.06	27.36	29.89	29.31	29.6	26.79	26.45	26.62
	C_M_08	27.21	26.97	27.09	28.4	28.21	28.305	26.15	25.87	26.01	27.22	26.84	27.03	29.67	29.37	29.52	26.73	26.4	26.565
	C_M_09	28.48	28.21	28.345	31.29	30.78	31.035	26.72	26.36	26.54	29.04	28.52	28.78	29.83	29.64	29.735	27.98	27.71	27.845
Hembras	C_F_01	28.39	28.14	28.265	31.31	30.73	31.02	26.57	26.27	26.42	27.89	27.18	27.535	28.97	28.02	28.495	26.76	26.19	26.475
	C_F_02	27.44	27.09	27.265	30.85	30.34	30.595	26.39	26.06	26.225	26.94	26.45	26.695	29.7	29.42	29.56	26.5	26.36	26.43
	C_F_03	27.31	27.21	27.26	28.76	28.49	28.625	26.16	25.68	25.92	27	27	27	28.88	28.56	28.72	25.42	25.26	25.34
	C_F_04	27.91	27.94	27.925	28.32	28.67	28.495	26.51	26.37	26.44	27.22	27.21	27.215	28.91	28.34	28.625	26.23	26.08	26.155
	C_F_05	27.92	28.06	27.99	31.33	31.57	31.45	26.12	25.94	26.03	28.22	28	28.11	28.05	27.99	28.02	27.43	27.13	27.28
	C_F_06	28.38	28.19	28.285	28.89	28.66	28.775	26.5	26.5	26.5	27.04	26.73	26.885	29.23	29.22	29.225	26.54	26.52	26.53
	C_F_07	27.87	27.79	27.83	28.95	28.93	28.94	26.34	26.22	26.28	27.9	27.94	27.92	29.23	29.35	29.29	26.76	26.73	26.745
	C_F_08	27.51	27.29	27.4	31.21	31.16	31.185	26.37	26.32	26.345	27.48	27.3	27.39	30.18	30.14	30.16	27.24	26.98	27.11
	C_F_09	28.5	28.03	28.265	29.45	29.44	29.445	26.76	26.44	26.6	28.38	28.04	28.21	29.35	29.4	29.375	27.83	27.61	27.72
	C_F_10	28.32	28.16	28.24	31.51	31.47	31.49	26.41	26.27	26.34	27.87	27.7	27.785	29.45	29.26	29.355	27.09	26.99	27.04
Machos	T3_M_01	28.16	27.98	28.07	29.45	29.13	29.29	26.24	26.3	26.27	29.54	29.38	29.46	30.43	30.51	30.47	28.66	28.84	28.75
	T3_M_02	27.1	27.11	27.105	28.11	28.12	28.115	25.72	25.73	25.725	27.84	27.88	27.86	29.95	30.33	30.14	28.75	28.53	28.64
	T3_M_03	27.62	27.64	27.63	31.52	32.27	31.895	25.84	25.71	25.775	28.51	28.35	28.43	30.03	30.05	30.04	28.17	27.95	28.06
	T3_M_04	28.15	27.53	27.84	27.33	27.17	27.25	25.73	25.64	25.685	28.79	28.94	28.865	29.34	29.18	29.26	28.53	28.24	28.385
	T3_M_05	27.37	27.56	27.465	29.42	29.53	29.475	25.94	26.02	25.98	29.18	29.14	29.16	29.46	29.75	29.605	27.47	27.48	27.475
	T3_M_06	28.35	28.56	28.455	29.88	29.78	29.83	25.71	25.5	25.605	29.34	29.11	29.225	28.86	28.61	28.735	28.15	28.09	28.12
	T3_M_07	26.74	27.12	26.93	28.48	28.66	28.57	25.6	25.84	25.72	28.37	28.23	28.3	28.5	28.72	28.61	27.15	27.2	27.175
	T3_M_08	28.27	28.33	28.3	28.88	29.05	28.965	26.44	26.42	26.43	29.41	29.39	29.4	30.3	31.01	30.655	29.06	29	29.03
Hembras	T3_F_01	28.73	28.83	28.78	30.09	30.45	30.27	26.99	27.03	27.01	28.86	28.89	28.875	29.5	29.67	29.585	28.83	28.31	28.57
	T3_F_02	28.54	28.23	28.385	32.71	32.45	32.58	26.74	26.89	26.815	30.05	30.26	30.155	30.41	30.92	30.665	29.18	29.44	29.31
	T3_F_03	28.18	28.43	28.305	30.95	31.41	31.18	26.38	26.31	26.345	28.17	28.37	28.27	29.45	29.48	29.465	27.8	27.79	27.795
	T3_F_04	28.09	28.24	28.165	30.2	30.1	30.15	26.28	26.31	26.295	28.3	28.46	28.38	29.22	29.84	29.53	28.01	28.27	28.14
	T3_F_05	28.14	28.09	28.115	29.8	30.06	29.93	26.51	26.64	26.575	29.21	29.21	29.21	29.95	30.07	30.01	28.15	28.1	28.125
	T3_F_06	27.59	27.97	27.78	31.61	31.32	31.465	26.34	26.46	26.4	27.28	27.56	27.42	30.63	31.05	30.84	27.94	27.53	27.735
	T3_F_07	27.72	27.96	27.84	31.13	31.14	31.135	25.93	26.02	25.975	28.67	28.88	28.775	29.08	29.02	29.05	27.63	27.82	27.725
	T3_F_08	27.21	27.42	27.315	29.98	30.03	30.005	25.66	25.92	25.79	27.1	27.32	27.21	29.19	29.36	29.275	26.42	26.37	26.395
	T3_F_09	27.73	27.85	27.79	28.65	28.42	28.535	26.26	25.97	26.115	27.88	28.01	27.945	28.08	28.36	28.22	26.36	26.41	26.385
	T3_F_10	28.27	28.39	28.33	31.38	31.4	31.39	26.33	26.33	26.33	27.76	28.07	27.915	29.61	30.59	30.1	27.24	27.34	27.29

## Sheet: Estadistica
	Peces	∆CT ASIP	∆CT d∆CT	∆CT foxd3	∆CT Kita	∆CT Kitb	∆CT MC1R	∆CT MITFa	∆CT Slc24a5	∆CT Sox10	∆CT TYR	∆CT TYRP1a	∆CT TYRP1b
Machos	C_M_01	-1.525		1.795	-0.845	4.46	0.735	0.865	2.695	0.01	0.7	2.28	0.075
	C_M_02	-0.445	6.075	1.64	-0.785	5.715	1.645	1.575	1.995	0.3	1.155	3.785	1.33
	C_M_03	0.38	4.775	2.055	-1.205	4.83	1.29	1.455	2.32	0.15	0.88	3.595	0.395
	C_M_04	-0.005	6.32	1.56	0.01	5.69	1.5	2.02	2.775	0.275	1.425	4.245	1.395
	C_M_05	-0.235	7.25	2.41	0.15	5.615	2.295	2.11	2.67	0.845	1.745	4.855	3.11
	C_M_06	-1.585	5.455	1.37	-0.85	4.105	1.41	1.415	2.66	-0.09	1.045	2.965	1.225
	C_M_07		6.13	1.675	-0.18	6.295	1.58	1.955	3.565	0.345	1.635	3.875	0.895
	C_M_08	-1.4	5.27	1.515	-0.66	6.12	1.23	0.985	2.2	-0.095	0.925	3.415	0.46
	C_M_09	0.27	6.745	3.665	0	7.95	3.64	3.68	0	0	0	5.07	3.18
Hembras	C_F_01			1.775	-0.645	3.815	1.47	2.03	4.785	0.185	1.3	2.26	0.24		0.220919
	C_F_02	-0.655	4.68	2.96	0.78	6.24	3.15	3.115	6.445	2.075	2.545	5.41	2.28		0.959696
	C_F_03	-1.17	4.785	2	-0.745	4.78	1.755	2.57	3.935	1.23	2.31	4.03	0.65		0.341709
	C_F_04	-0.185	5.3	2	0.785	6.15	2.625	3.325	3.895	1.84	2.615	4.025	1.555		0.0857263
	C_F_05	-1.935		1.565	-0.34	4.785	1.45	2.625	6.085	0.665	2.745	2.655	1.915
	C_F_06	0.195	4.545	3.25	0	6.97	3.795	4.455	4.945	2.67	3.055	5.395	2.7
	C_F_07	-1.43	3.68	0.975	-0.34	4.46	1.795	2.375	3.485	0.825	2.465	3.835	1.29
	C_F_08	-1.195		2.02	0.245	4.805	3.145	2.58	6.365	1.525	2.57	5.34	2.29
	C_F_09	-1.245	3.42	1.245	-0.125	4.445	2.34	2.26	3.44	0.595	2.205	3.37	1.715
	C_F_10	-1.72	4.875	1.68	0.33	5.635	2.055	2.57	5.82	0.67	2.115	3.685	1.37
Machos	T3_M_01	-1.935	4.655	1.54	-1.23	3.35	0.15	1.41	2.63	-0.39	2.8	3.81	2.09
	T3_M_02	-1.225		1.23	-0.97	4.705	0.205	0.765	1.775	-0.615	1.52	3.8	2.3
	T3_M_03	-0.365	5.925	2.81	0.515	6.7	2.315	3.19	7.455	1.335	3.99	5.6	3.62
	T3_M_04	0.295	4.89	1.91	0.27	4.9	1.48	2.21	1.62	0.055	3.235	3.63	2.755
	T3_M_05	1.01	7.87	3.01	1.4	5.975	3.08	3.995	6.005	2.51	5.69	6.135	4.005
	T3_M_06	-1.13	5.505	0.945	-0.54	5.07	0.995	2.13	3.505	-0.72	2.9	2.41	1.795
	T3_M_07	0.1	5.185	1.5	-0.41	5.79	0.755	1.68	3.32	0.47	3.05	3.36	1.925
	T3_M_08	-1.11	4.845	0.84	-0.705	3.63	0.64	1.75	2.415	-0.12	2.85	4.105	2.48
Hembras	T3_F_01	-1.66	1.28	1.985	-0.625	5.36	0.975	2.815	4.305	1.045	2.91	3.62	2.605
	T3_F_02	-2.89		1.365	-1.815	3.45	1.815	2.16	6.355	0.59	3.93	4.44	3.085
	T3_F_03		4.17	1.965	-0.365	4.83	2.72	3.68	6.555	1.72	3.645	4.84	3.17
	T3_F_04	-1.705	3.635	1.795	-0.75	3.65	1.12	2.48	4.465	0.61	2.695	3.845	2.455
	T3_F_05	-1.225	4.075	1.645	-0.985	4.56	1.45	2.17	3.985	0.63	3.265	4.065	2.18
	T3_F_06	0	3.73	1.885	0.05	5.53	2.95	3.095	6.78	1.715	2.735	6.155	3.05
	T3_F_07	-0.715		1.4	-0.61	4.995	1.305	2.16	5.455	0.295	3.095	3.37	2.045
	T3_F_08	-2.405		-0.125	0.04	5.15	0.28	1.37	4.06	-0.155	1.265	3.33	0
	T3_F_09	-0.83	3.725	0.545	-0.175	4.695	0.49	2.135	2.88	0.46	2.29	2.565	0
	T3_F_10		2.075	2.27	-2.035	4.095	1.455	2.14	5.2	0.14	1.725	3.91	1.1
ASIP					dct					foxd3					Kita					Kitb					MC1R
C M vs H
Prueba t para dos muestras suponiendo varianzas iguales					Prueba t para dos muestras suponiendo varianzas iguales					Prueba t para dos muestras suponiendo varianzas iguales					Prueba t para dos muestras suponiendo varianzas iguales					Prueba t para dos muestras suponiendo varianzas iguales					Prueba t para dos muestras suponiendo varianzas iguales
	Variable 1	Variable 2				Variable 1	Variable 2				Variable 1	Variable 2				Variable 1	Variable 2				Variable 1	Variable 2				Variable 1	Variable 2
Media	-0.743889	-0.9955			Media	5.76722	4.884			Media	1.965	1.947			Media	-0.333333	0.207			Media	5.64222	5.2085			Media	1.78444	2.358
Varianza	0.863824	0.45153			Varianza	1.06982	0.842249			Varianza	0.504412	0.491034			Varianza	0.607325	0.744284			Varianza	1.30112	0.982889			Varianza	0.694634	0.640957
Observaciones	9	10			Observaciones	9	10			Observaciones	9	10			Observaciones	9	10			Observaciones	9	10			Observaciones	9	10
Varianza agrupada	0.645551				Varianza agrupada	0.949341				Varianza agrupada	0.49733				Varianza agrupada	0.679833				Varianza agrupada	1.13264				Varianza agrupada	0.666217
Diferencia hipotética de las medias	0				Diferencia hipotética de las medias	0				Diferencia hipotética de las medias	0				Diferencia hipotética de las medias	0				Diferencia hipotética de las medias	0				Diferencia hipotética de las medias	0
Grados de libertad	17				Grados de libertad	17				Grados de libertad	17				Grados de libertad	17				Grados de libertad	17				Grados de libertad	17
Estadístico t	0.681568				Estadístico t	1.97289				Estadístico t	0.0555514				Estadístico t	-1.42628				Estadístico t	0.886971				Estadístico t	-1.52937
P(T<=t) una cola	0.252346				P(T<=t) una cola	0.0324978				P(T<=t) una cola	0.478173				P(T<=t) una cola	0.0859469				P(T<=t) una cola	0.193735				P(T<=t) una cola	0.0722835
Valor crítico de t (una cola)	1.73961				Valor crítico de t (una cola)	1.73961				Valor crítico de t (una cola)	1.73961				Valor crítico de t (una cola)	1.73961				Valor crítico de t (una cola)	1.73961				Valor crítico de t (una cola)	1.73961
P(T<=t) dos colas	0.504692				P(T<=t) dos colas	0.0649956				P(T<=t) dos colas	0.956347				P(T<=t) dos colas	0.171894				P(T<=t) dos colas	0.387471				P(T<=t) dos colas	0.144567
Valor crítico de t (dos colas)	2.10982				Valor crítico de t (dos colas)	2.10982				Valor crítico de t (dos colas)	2.10982				Valor crítico de t (dos colas)	2.10982				Valor crítico de t (dos colas)	2.10982				Valor crítico de t (dos colas)	2.10982
C vs T3
Prueba t para dos muestras suponiendo varianzas iguales					Prueba t para dos muestras suponiendo varianzas iguales					Prueba t para dos muestras suponiendo varianzas iguales					Prueba t para dos muestras suponiendo varianzas iguales					Prueba t para dos muestras suponiendo varianzas iguales					Prueba t para dos muestras suponiendo varianzas iguales
	Variable 1	Variable 2				Variable 1	Variable 2				Variable 1	Variable 2				Variable 1	Variable 2				Variable 1	Variable 2				Variable 1	Variable 2
Media	-0.876316	-0.8525			Media	5.30237	4.46556			Media	1.95553	1.58417			Media	-0.0489474	-0.496667			Media	5.41395	4.80194			Media	2.04763	1.34333
Varianza	0.626347	1.14508			Varianza	1.10188	2.5765			Varianza	0.469786	0.57273			Varianza	0.718896	0.6569			Varianza	1.11922	0.838386			Varianza	0.743418	0.8488
Observaciones	19	18			Observaciones	19	18			Observaciones	19	18			Observaciones	19	18			Observaciones	19	18			Observaciones	19	18
Varianza agrupada	0.878304				Varianza agrupada	1.81813				Varianza agrupada	0.519787				Varianza agrupada	0.688784				Varianza agrupada	0.982817				Varianza agrupada	0.794603
Diferencia hipotética de las medias	0				Diferencia hipotética de las medias	0				Diferencia hipotética de las medias	0				Diferencia hipotética de las medias	0				Diferencia hipotética de las medias	0				Diferencia hipotética de las medias	0
Grados de libertad	35				Grados de libertad	35				Grados de libertad	35				Grados de libertad	35				Grados de libertad	35				Grados de libertad	35
Estadístico t	-0.07726				Estadístico t	1.88681				Estadístico t	1.56601				Estadístico t	1.64012				Estadístico t	1.87685				Estadístico t	2.40211
P(T<=t) una cola	0.469428				P(T<=t) una cola	0.0337515				P(T<=t) una cola	0.0631722				P(T<=t) una cola	0.0549689				P(T<=t) una cola	0.0344477				P(T<=t) una cola	0.0108711
Valor crítico de t (una cola)	1.68957				Valor crítico de t (una cola)	1.68957				Valor crítico de t (una cola)	1.68957				Valor crítico de t (una cola)	1.68957				Valor crítico de t (una cola)	1.68957				Valor crítico de t (una cola)	1.68957
P(T<=t) dos colas	0.938857				P(T<=t) dos colas	0.067503				P(T<=t) dos colas	0.126344				P(T<=t) dos colas	0.109938				P(T<=t) dos colas	0.0688953				P(T<=t) dos colas	0.0217422
Valor crítico de t (dos colas)	2.03011				Valor crítico de t (dos colas)	2.03011				Valor crítico de t (dos colas)	2.03011				Valor crítico de t (dos colas)	2.03011				Valor crítico de t (dos colas)	2.03011				Valor crítico de t (dos colas)	2.03011
C_M vs T3_M
Prueba t para dos muestras suponiendo varianzas iguales					Prueba t para dos muestras suponiendo varianzas iguales					Prueba t para dos muestras suponiendo varianzas iguales					Prueba t para dos muestras suponiendo varianzas iguales					Prueba t para dos muestras suponiendo varianzas iguales					Prueba t para dos muestras suponiendo varianzas iguales
	Variable 1	Variable 2				Variable 1	Variable 2				Variable 1	Variable 2				Variable 1	Variable 2				Variable 1	Variable 2				Variable 1	Variable 2
Media	-0.743889	-0.545			Media	5.76722	5.11313			Media	1.965	1.72313			Media	-0.333333	-0.20875			Media	5.64222	5.015			Media	1.70278	1.2025
Varianza	0.863824	0.946857			Varianza	1.06982	2.60792			Varianza	0.504412	0.654878			Varianza	0.607325	0.76572			Varianza	1.30112	1.30918			Varianza	0.697413	1.07174
Observaciones	9	8			Observaciones	9	8			Observaciones	9	8			Observaciones	9	8			Observaciones	9	8			Observaciones	9	8
Varianza agrupada	0.902573				Varianza agrupada	1.7876				Varianza agrupada	0.57463				Varianza agrupada	0.681243				Varianza agrupada	1.30488				Varianza agrupada	0.872097
Diferencia hipotética de las medias	0				Diferencia hipotética de las medias	0				Diferencia hipotética de las medias	0				Diferencia hipotética de las medias	0				Diferencia hipotética de las medias	0				Diferencia hipotética de las medias	0
Grados de libertad	15				Grados de libertad	15				Grados de libertad	15				Grados de libertad	15				Grados de libertad	15				Grados de libertad	15
Estadístico t	-0.430835				Estadístico t	1.00681				Estadístico t	0.656657				Estadístico t	-0.310635				Estadístico t	1.13				Estadístico t	1.10248
P(T<=t) una cola	0.336358				P(T<=t) una cola	0.164995				P(T<=t) una cola	0.260675				P(T<=t) una cola	0.380176				P(T<=t) una cola	0.138112				P(T<=t) una cola	0.143814
Valor crítico de t (una cola)	1.75305				Valor crítico de t (una cola)	1.75305				Valor crítico de t (una cola)	1.75305				Valor crítico de t (una cola)	1.75305				Valor crítico de t (una cola)	1.75305				Valor crítico de t (una cola)	1.75305
P(T<=t) dos colas	0.672715				P(T<=t) dos colas	0.329991				P(T<=t) dos colas	0.521349				P(T<=t) dos colas	0.760352				P(T<=t) dos colas	0.276223				P(T<=t) dos colas	0.287628
Valor crítico de t (dos colas)	2.13145				Valor crítico de t (dos colas)	2.13145				Valor crítico de t (dos colas)	2.13145				Valor crítico de t (dos colas)	2.13145				Valor crítico de t (dos colas)	2.13145				Valor crítico de t (dos colas)	2.13145
C_F vs T3_F
Prueba t para dos muestras suponiendo varianzas iguales					Prueba t para dos muestras suponiendo varianzas iguales					Prueba t para dos muestras suponiendo varianzas iguales					Prueba t para dos muestras suponiendo varianzas iguales					Prueba t para dos muestras suponiendo varianzas iguales					Prueba t para dos muestras suponiendo varianzas iguales
	Variable 1	Variable 2				Variable 1	Variable 2				Variable 1	Variable 2				Variable 1	Variable 2				Variable 1	Variable 2				Variable 1	Variable 2
Media	-0.9955	-1.0985			Media	4.884	3.9475			Media	1.947	1.473			Media	0.207	-0.727			Media	5.2085	4.6315			Media	2.358	1.456
Varianza	0.45153	1.2752			Varianza	0.842249	2.16738			Varianza	0.491034	0.541579			Varianza	0.744284	0.512618			Varianza	0.982889	0.492739			Varianza	0.640957	0.737982
Observaciones	10	10			Observaciones	10	10			Observaciones	10	10			Observaciones	10	10			Observaciones	10	10			Observaciones	10	10
Varianza agrupada	0.863365				Varianza agrupada	1.50482				Varianza agrupada	0.516307				Varianza agrupada	0.628451				Varianza agrupada	0.737814				Varianza agrupada	0.689469
Diferencia hipotética de las medias	0				Diferencia hipotética de las medias	0				Diferencia hipotética de las medias	0				Diferencia hipotética de las medias	0				Diferencia hipotética de las medias	0				Diferencia hipotética de las medias	0
Grados de libertad	18				Grados de libertad	18				Grados de libertad	18				Grados de libertad	18				Grados de libertad	18				Grados de libertad	18
Estadístico t	0.247871				Estadístico t	1.70707				Estadístico t	1.47506				Estadístico t	2.63449				Estadístico t	1.50206				Estadístico t	2.42904
P(T<=t) una cola	0.40352				P(T<=t) una cola	0.0525003				P(T<=t) una cola	0.078737				P(T<=t) una cola	0.00841565				P(T<=t) una cola	0.0752109				P(T<=t) una cola	0.0129186
Valor crítico de t (una cola)	1.73406				Valor crítico de t (una cola)	1.73406				Valor crítico de t (una cola)	1.73406				Valor crítico de t (una cola)	1.73406				Valor crítico de t (una cola)	1.73406				Valor crítico de t (una cola)	1.73406
P(T<=t) dos colas	0.80704				P(T<=t) dos colas	0.105001				P(T<=t) dos colas	0.157474				P(T<=t) dos colas	0.0168313				P(T<=t) dos colas	0.150422				P(T<=t) dos colas	0.0258371
Valor crítico de t (dos colas)	2.10092				Valor crítico de t (dos colas)	2.10092				Valor crítico de t (dos colas)	2.10092				Valor crítico de t (dos colas)	2.10092				Valor crítico de t (dos colas)	2.10092				Valor crítico de t (dos colas)	2.10092
MITFa					Slc24a5					Sox10					TYR					TYRP1a					TYRP1b
C M vs H
Prueba t para dos muestras suponiendo varianzas iguales					Prueba t para dos muestras suponiendo varianzas iguales					Prueba t para dos muestras suponiendo varianzas iguales					Prueba t para dos muestras suponiendo varianzas iguales					Prueba t para dos muestras suponiendo varianzas iguales					Prueba t para dos muestras suponiendo varianzas iguales
	Variable 1	Variable 2				Variable 1	Variable 2				Variable 1	Variable 2				Variable 1	Variable 2				Variable 1	Variable 2				Variable 1	Variable 2
Media	1.78444	2.7905			Media	3.02778	4.92			Media	0.401667	1.228			Media	1.51389	2.3925			Media	3.78722	4.0005			Media	1.34056	1.6005
Varianza	0.694634	0.484769			Varianza	1.76872	1.43002			Varianza	0.38775	0.615423			Varianza	1.07518	0.220579			Varianza	0.765776	1.23236			Varianza	1.25007	0.573786
Observaciones	9	10			Observaciones	9	10			Observaciones	9	10			Observaciones	9	10			Observaciones	9	10			Observaciones	9	10
Varianza agrupada	0.583529				Varianza agrupada	1.58941				Varianza agrupada	0.508283				Varianza agrupada	0.622744				Varianza agrupada	1.01279				Varianza agrupada	0.892035
Diferencia hipotética de las medias	0				Diferencia hipotética de las medias	0				Diferencia hipotética de las medias	0				Diferencia hipotética de las medias	0				Diferencia hipotética de las medias	0				Diferencia hipotética de las medias	0
Grados de libertad	17				Grados de libertad	17				Grados de libertad	17				Grados de libertad	17				Grados de libertad	17				Grados de libertad	17
Estadístico t	-2.86639				Estadístico t	-3.26662				Estadístico t	-2.52259				Estadístico t	-2.42318				Estadístico t	-0.461244				Estadístico t	-0.59901
P(T<=t) una cola	0.00534862				P(T<=t) una cola	0.002273				P(T<=t) una cola	0.0109548				P(T<=t) una cola	0.0134181				P(T<=t) una cola	0.325235				P(T<=t) una cola	0.278533
Valor crítico de t (una cola)	1.73961				Valor crítico de t (una cola)	1.73961				Valor crítico de t (una cola)	1.73961				Valor crítico de t (una cola)	1.73961				Valor crítico de t (una cola)	1.73961				Valor crítico de t (una cola)	1.73961
P(T<=t) dos colas	0.0106972				P(T<=t) dos colas	0.004546				P(T<=t) dos colas	0.0219096				P(T<=t) dos colas	0.0268362				P(T<=t) dos colas	0.65047				P(T<=t) dos colas	0.557065
Valor crítico de t (dos colas)	2.10982				Valor crítico de t (dos colas)	2.10982				Valor crítico de t (dos colas)	2.10982				Valor crítico de t (dos colas)	2.10982				Valor crítico de t (dos colas)	2.10982				Valor crítico de t (dos colas)	2.10982
C vs T3
Prueba t para dos muestras suponiendo varianzas iguales					Prueba t para dos muestras suponiendo varianzas iguales					Prueba t para dos muestras suponiendo varianzas iguales					Prueba t para dos muestras suponiendo varianzas iguales					Prueba t para dos muestras suponiendo varianzas iguales					Prueba t para dos muestras suponiendo varianzas iguales
	Variable 1	Variable 2				Variable 1	Variable 2				Variable 1	Variable 2				Variable 1	Variable 2				Variable 1	Variable 2				Variable 1	Variable 2
Media	2.31395	2.29639			Media	4.02368	4.37583			Media	0.836579	0.531944			Media	1.97632	2.97722			Media	3.89947	4.055			Media	1.47737	2.32444
Varianza	0.817465	0.667352			Varianza	2.44335	3.17959			Varianza	0.659736	0.748647			Varianza	0.791294	1.0117			Varianza	0.968494	1.10909			Varianza	0.860259	0.869256
Observaciones	19	18			Observaciones	19	18			Observaciones	19	18			Observaciones	19	18			Observaciones	19	18			Observaciones	19	18
Varianza agrupada	0.744553				Varianza agrupada	2.80095				Varianza agrupada	0.702922				Varianza agrupada	0.89835				Varianza agrupada	1.03678				Varianza agrupada	0.864629
Diferencia hipotética de las medias	0				Diferencia hipotética de las medias	0				Diferencia hipotética de las medias	0				Diferencia hipotética de las medias	0				Diferencia hipotética de las medias	0				Diferencia hipotética de las medias	0
Grados de libertad	35				Grados de libertad	35				Grados de libertad	35				Grados de libertad	35				Grados de libertad	35				Grados de libertad	35
Estadístico t	0.0618659				Estadístico t	-0.639714				Estadístico t	1.10468				Estadístico t	-3.21058				Estadístico t	-0.464379				Estadístico t	-2.76962
P(T<=t) una cola	0.475511				P(T<=t) una cola	0.263262				P(T<=t) una cola	0.138417				P(T<=t) una cola	0.00141867				P(T<=t) una cola	0.322626				P(T<=t) una cola	0.00445922
Valor crítico de t (una cola)	1.68957				Valor crítico de t (una cola)	1.68957				Valor crítico de t (una cola)	1.68957				Valor crítico de t (una cola)	1.68957				Valor crítico de t (una cola)	1.68957				Valor crítico de t (una cola)	1.68957
P(T<=t) dos colas	0.951022				P(T<=t) dos colas	0.526524				P(T<=t) dos colas	0.276833				P(T<=t) dos colas	0.00283733				P(T<=t) dos colas	0.645252				P(T<=t) dos colas	0.00891844
Valor crítico de t (dos colas)	2.03011				Valor crítico de t (dos colas)	2.03011				Valor crítico de t (dos colas)	2.03011				Valor crítico de t (dos colas)	2.03011				Valor crítico de t (dos colas)	2.03011				Valor crítico de t (dos colas)	2.03011
C_M vs T3_M
Prueba t para dos muestras suponiendo varianzas iguales					Prueba t para dos muestras suponiendo varianzas iguales					Prueba t para dos muestras suponiendo varianzas iguales					Prueba t para dos muestras suponiendo varianzas iguales					Prueba t para dos muestras suponiendo varianzas iguales					Prueba t para dos muestras suponiendo varianzas iguales
	Variable 1	Variable 2				Variable 1	Variable 2				Variable 1	Variable 2				Variable 1	Variable 2				Variable 1	Variable 2				Variable 1	Variable 2
Media	1.78444	2.14125			Media	3.02778	3.59063			Media	0.401667	0.315625			Media	1.51389	3.25438			Media	3.78722	4.10625			Media	1.34056	2.62125
Varianza	0.694634	1.04796			Varianza	1.76872	4.33256			Varianza	0.38775	1.22463			Varianza	1.07518	1.43131			Varianza	0.765776	1.45566			Varianza	1.25007	0.643284
Observaciones	9	8			Observaciones	9	8			Observaciones	9	8			Observaciones	9	8			Observaciones	9	8			Observaciones	9	8
Varianza agrupada	0.859521				Varianza agrupada	2.96518				Varianza agrupada	0.778295				Varianza agrupada	1.24137				Varianza agrupada	1.08772				Varianza agrupada	0.966901
Diferencia hipotética de las medias	0				Diferencia hipotética de las medias	0				Diferencia hipotética de las medias	0				Diferencia hipotética de las medias	0				Diferencia hipotética de las medias	0				Diferencia hipotética de las medias	0
Grados de libertad	15				Grados de libertad	15				Grados de libertad	15				Grados de libertad	15				Grados de libertad	15				Grados de libertad	15
Estadístico t	-0.792037				Estadístico t	-0.672677				Estadístico t	0.200714				Estadístico t	-3.21485				Estadístico t	-0.629522				Estadístico t	-2.68038
P(T<=t) una cola	0.220343				P(T<=t) una cola	0.255691				P(T<=t) una cola	0.421809				P(T<=t) una cola	0.0028926				P(T<=t) una cola	0.269239				P(T<=t) una cola	0.00855938
Valor crítico de t (una cola)	1.75305				Valor crítico de t (una cola)	1.75305				Valor crítico de t (una cola)	1.75305				Valor crítico de t (una cola)	1.75305				Valor crítico de t (una cola)	1.75305				Valor crítico de t (una cola)	1.75305
P(T<=t) dos colas	0.440686				P(T<=t) dos colas	0.511383				P(T<=t) dos colas	0.843618				P(T<=t) dos colas	0.00578521				P(T<=t) dos colas	0.538478				P(T<=t) dos colas	0.0171188
Valor crítico de t (dos colas)	2.13145				Valor crítico de t (dos colas)	2.13145				Valor crítico de t (dos colas)	2.13145				Valor crítico de t (dos colas)	2.13145				Valor crítico de t (dos colas)	2.13145				Valor crítico de t (dos colas)	2.13145
C_F vs T3_F
Prueba t para dos muestras suponiendo varianzas iguales					Prueba t para dos muestras suponiendo varianzas iguales					Prueba t para dos muestras suponiendo varianzas iguales					Prueba t para dos muestras suponiendo varianzas iguales					Prueba t para dos muestras suponiendo varianzas iguales					Prueba t para dos muestras suponiendo varianzas iguales
	Variable 1	Variable 2				Variable 1	Variable 2				Variable 1	Variable 2				Variable 1	Variable 2				Variable 1	Variable 2				Variable 1	Variable 2
Media	2.7905	2.4205			Media	4.92	5.004			Media	1.228	0.705			Media	2.3925	2.7555			Media	4.0005	4.014			Media	1.6005	2.087
Varianza	0.484769	0.406964			Varianza	1.43002	1.64964			Varianza	0.615423	0.38675			Varianza	0.220579	0.674852			Varianza	1.23236	0.95856			Varianza	0.573786	1.00065
Observaciones	10	10			Observaciones	10	10			Observaciones	10	10			Observaciones	10	10			Observaciones	10	10			Observaciones	10	10
Varianza agrupada	0.445866				Varianza agrupada	1.53983				Varianza agrupada	0.501087				Varianza agrupada	0.447716				Varianza agrupada	1.09546				Varianza agrupada	0.787216
Diferencia hipotética de las medias	0				Diferencia hipotética de las medias	0				Diferencia hipotética de las medias	0				Diferencia hipotética de las medias	0				Diferencia hipotética de las medias	0				Diferencia hipotética de las medias	0
Grados de libertad	18				Grados de libertad	18				Grados de libertad	18				Grados de libertad	18				Grados de libertad	18				Grados de libertad	18
Estadístico t	1.23904				Estadístico t	-0.151366				Estadístico t	1.65208				Estadístico t	-1.21308				Estadístico t	-0.0288417				Estadístico t	-1.22609
P(T<=t) una cola	0.115623				P(T<=t) una cola	0.440685				P(T<=t) una cola	0.0579278				P(T<=t) una cola	0.120389				P(T<=t) una cola	0.488654				P(T<=t) una cola	0.117983
Valor crítico de t (una cola)	1.73406				Valor crítico de t (una cola)	1.73406				Valor crítico de t (una cola)	1.73406				Valor crítico de t (una cola)	1.73406				Valor crítico de t (una cola)	1.73406				Valor crítico de t (una cola)	1.73406
P(T<=t) dos colas	0.231246				P(T<=t) dos colas	0.881371				P(T<=t) dos colas	0.115856				P(T<=t) dos colas	0.240778				P(T<=t) dos colas	0.977308				P(T<=t) dos colas	0.235965
Valor crítico de t (dos colas)	2.10092				Valor crítico de t (dos colas)	2.10092				Valor crítico de t (dos colas)	2.10092				Valor crítico de t (dos colas)	2.10092				Valor crítico de t (dos colas)	2.10092				Valor crítico de t (dos colas)	2.10092

## Sheet: Resultados T3-x S1
Gen	C M vs H			T3 vs C			Machos			Hembras						Fold	Error
	Significatividad	Fold	Error	Significatividad	Fold	Error	Significatividad	Fold	Error	Significatividad	Fold	Error		ASIP	Todos	-0.888775	0.118911
ASIP	0.504692	-1.24132	0.220707	0.938857	-0.888775	0.118911	0.672715	-0.972655	0.212218	0.80704	1.31128	0.369186			Machos	-0.972655	0.212218
dct	0.0649956	-2.8943	0.617081	0.067503	1.85253	1.14819	0.329991	1.36503	0.297401	0.105001	2.34219	1.12748			Hembras	1.31128	0.369186
foxd3	0.956347	-1.01255	0.150178	0.126344	1.29357	0.207259	0.521349	1.18253	0.220512	0.157474	1.38896	0.333204
Kita	0.171894	1.45348	0.169754	0.109938	1.17827	0.184008	0.760352	-1.09019	0.170174	0.0168313	1.91057	0.393632		dct	Todos	1.85253	1.14819
Kitb	0.387471	-1.35071	0.304182	0.0688953	1.52838	0.271349	0.276223	1.54459	0.565017	0.150422	1.49174	0.279233			Machos	1.36503	0.297401
MC1R	0.144567	1.57486	0.247642	0.0217422	1.62935	0.243432	0.287628	1.41449	0.330073	0.0258371	1.86865	0.357913			Hembras	2.34219	1.12748
MITFa	0.0106972	2.00841	0.333408	0.951022	1.01224	0.14891	0.440686	-1.28059	0.212585	0.231246	1.29235	0.183788
Slc24a5	0.004546	4.95883	0.544932	0.526524	-1.61039	1.04468	0.511383	-1.47718	0.286186	0.881371	-1.05995	0.324103		foxd3	Todos	1.29357	0.207259
Sox10	0.0219096	2.01461	0.14105	0.276833	1.18669	0.168484	0.843618	1.06145	0.244895	0.115856	1.43694	0.187993			Machos	1.18253	0.220512
TYR	0.0268362	2.30338	0.20886	0.00283733	-2.32541	0.397617	0.00578521	-3.34148	0.535163	0.240778	-1.2861	0.168715			Hembras	1.38896	0.333204
TYRP1a	0.65047	1.15932	0.289937	0.645252	-1.11383	0.214597	0.538478	-1.24749	0.311988	0.977308	-1.0094	0.310651
TYRP1b	0.557065	1.19743	0.28839	0.00891844	-2.09055	0.334646	0.0171188	-2.42956	0.585136	0.235965	-1.81598	0.375033		Kita	Todos	1.17827	0.184008
															Machos	-1.09019	0.170174
															Hembras	1.91057	0.393632
														Kitb	Todos	1.62935	0.243432
															Machos	1.54459	0.565017
															Hembras	1.49174	0.279233
														MC1R	Todos	1.62935	0.243432
															Machos	1.41449	0.330073
															Hembras	1.86865	0.357913
														MITFa	Todos	1.01224	0.14891
															Machos	-1.28059	0.212585
															Hembras	1.29235	0.183788
														Slc24a5	Todos	-1.61039	1.04468
															Machos	-1.47718	0.286186
															Hembras	-1.05995	0.324103
														Sox10	Todos	1.18669	0.168484
															Machos	1.06145	0.244895
															Hembras	1.43694	0.187993
														TYR	Todos	-2.32541	0.397617
															Machos	-3.34148	0.535163
															Hembras	-1.2861	0.168715
														TYRP1a	Todos	-1.11383	0.214597
															Machos	-1.24749	0.311988
															Hembras	-1.0094	0.310651
														TYRP1b	Todos	-2.09055	0.334646
															Machos	-2.42956	0.585136
															Hembras	-1.81598	0.375033

## Sheet: Modelo
						Machos como tratamiento dentro de los controles										T3 vs Controles con independencia del sexo
Tratamiento	M CT Act	M CT XXX	∆CT			2^(-∆CT)	∆∆CT	2^(-∆∆CT)	Media ∆CT	∆∆CT	2^(-∆∆CT)	Media Geo	Error			2^(-∆CT)	∆∆CT	2^(-∆∆CT)	Media ∆CT	∆∆CT	2^(-∆∆CT)	Media Geo	Error
C_M_01	25.965	24.44	-1.525			2.87787				-0.5295	1.44343					2.87787				-0.648684	1.56774
C_M_02	25.91	25.465	-0.445			1.36131				0.5505	0.682783					1.36131				0.431316	0.741585
C_M_03	25.245	25.625	0.38			0.768438				1.3755	0.385419					0.768438				1.25632	0.418612
C_M_04	25.13	25.125	-0.005			1.00347				0.9905	0.503303					1.00347				0.871316	0.546648
C_M_05	25.16	24.925	-0.235			1.17691				0.7605	0.590292					1.17691				0.641316	0.641128
C_M_06	25.92	24.335	-1.585			3.00008				-0.5895	1.50473					3.00008				-0.708684	1.63431
C_M_07	25.725	23.575	-2.15			4.43828				-1.1545	2.22607					4.43828				-1.27368	2.41778
C_M_08	26.105	24.705	-1.4			2.63902				-0.4045	1.32363					2.63902				-0.523684	1.43762
C_M_09	24.665	24.935	0.27			0.82932				1.2655	0.415955					0.82932				1.14632	0.451777
Media C_M	25.5361	24.7922	-0.743889		Medias/Fold	2.01052			-0.743889			0.839958	0.213852			1.53156				0.261316	0.834327
C_F_01	26.235	25.62	-0.615			1.53156				0.3805	0.768171					1.57462				0.221316	0.857783
C_F_02	24.15	23.495	-0.655			1.57462				0.3405	0.789768					2.25012				-0.293684	1.22577
C_F_03	24.69	23.52	-1.17			2.25012				-0.1745	1.12857					1.13682				0.691316	0.619289
C_F_04	24.6	24.415	-0.185			1.13682				0.8105	0.570184					3.82378				-1.05868	2.08303
C_F_05	25.365	23.43	-1.935			3.82378				-0.9395	1.91786					0.873573				1.07132	0.475885
C_F_06	23.83	24.025	0.195			0.873573				1.1905	0.438151					2.69447				-0.553684	1.46783
C_F_07	25.455	24.025	-1.43			2.69447				-0.4345	1.35144					2.28945				-0.318684	1.24719
C_F_08	24.82	23.625	-1.195			2.28945				-0.1995	1.1483					2.37019				-0.368684	1.29117
C_F_09	26.005	24.76	-1.245			2.37019				-0.2495	1.1888					3.29436				-0.843684	1.79463
C_F_10	25.67	23.95	-1.72			3.29436				-0.7245	1.65233
Media C_F	25.082	24.0865	-0.9955		Medias	2.18389			-0.9955						Medias/Fold	2.10177			-0.876316			1	0.135229
Media C	25.2971	24.4208	-0.876316		Fold	0.920613	0.251611	0.839958				1	0.148066			3.82378				-1.05868	2.08303
T3_M_01	26.66	24.725	-1.935							-0.781111	1.71845					2.33755				-0.348684	1.2734
T3_M_02	26.34	25.115	-1.225							0.298889	0.812878					1.28788				0.511316	0.701582
T3_M_03	24.44	24.075	-0.365							1.12389	0.458855					0.815072				1.17132	0.444016
T3_M_04	25.63	25.925	0.295							0.738889	0.599201					0.496546				1.88632	0.270497
T3_M_05	23.47	24.48	1.01							0.508889	0.702763					2.18859				-0.253684	1.19225
T3_M_06	26.325	25.195	-1.13							-0.841111	1.79143					0.933033				0.976316	0.508276
T3_M_07	25.25	25.35	0.1							-1.40611	2.65022					2.15846				-0.233684	1.17583
T3_M_08	26.55	25.44	-1.11							-0.656111	1.57583					3.16017				-0.783684	1.72152
Media T3_M	25.5831	25.0381	-0.545							1.01389	0.49521					7.4127				-2.01368	4.03812
T3_F_01	25.965	24.305	-1.66									-1	0.254598			1				0.876316	0.544757
T3_F_02	26.225	23.335	-2.89							0.128889	0.914536					3.26029				-0.828684	1.77606
T3_F_03	24.625	24.625	0							0.0888889	0.940247					2.33755				-0.348684	1.2734
T3_F_04	25.685	23.98	-1.705							-0.426111	1.34361					0.532185				1.78632	0.289911
T3_F_05	25.945	24.72	-1.225							0.558889	0.678825					1.64148				0.161316	0.894209
T3_F_06	24.685	25.595	0.91							-1.19111	2.28329					5.29636				-1.52868	2.88523
T3_F_07	25.68	24.965	-0.715							0.938889	0.521634					1.77769				0.0463158	0.968406
T3_F_08	25.945	23.54	-2.405							-0.686111	1.60894					1.38032				0.411316	0.751937
T3_F_09	25.655	24.825	-0.83							-0.451111	1.36709
T3_F_10	26.19	25.725	-0.465							-0.501111	1.4153				Medias	2.32443			-0.8525
Media T3_F	25.66	24.5615	-1.0985							-0.976111	1.96716				Fold	1.10594	0.0238158	0.983628				0.983628	0.228513
Media T3	25.6258	24.7733	-0.8525																	-0.6725	1.59383
						-1.08623	-0.251611	-1.19054				-1.19054	0.176278							0.4075	0.753929
																				1.2325	0.425579
Machos																				0.8475	0.555747
						T3_M Vs C_M														0.6175	0.651799
Tratamiento	M CT Act	M CT XXX	∆CT			2^(-∆CT)	∆∆CT	2^(-∆∆CT)	Media ∆CT	∆∆CT	2^(-∆∆CT)	Media Geo	Error							-0.7325	1.66152
C_M_01	25.965	24.44	-1.525			2.87787				-0.781111	1.71845									-1.2975	2.45803
C_M_02	25.91	25.465	-0.445			1.36131				0.298889	0.812878									-0.5475	1.46155
C_M_03	25.245	25.625	0.38			0.768438				1.12389	0.458855									1.1225	0.459297
C_M_04	25.13	25.125	-0.005			1.00347				0.738889	0.599201									0.2375	0.848214
C_M_05	25.16	24.925	-0.235			1.17691				0.508889	0.702763									0.1975	0.87206
C_M_06	25.92	24.335	-1.585			3.00008				-0.841111	1.79143									-0.3175	1.24617
C_M_07	25.725	23.575	-2.15			4.43828				-1.40611	2.65022									0.6675	0.629597
C_M_08	26.105	24.705	-1.4			2.63902				-0.656111	1.57583									-1.0825	2.1177
C_M_09	24.665	24.935	0.27			0.82932				1.01389	0.49521									1.0475	0.483806
Media C_M	25.5361	24.7922	-0.743889		Medias/Fold	2.01052			-0.743889			1	0.254598							-0.5775	1.49226
T3_M_01	26.66	24.725	-1.935			3.82378				-1.19111	2.28329									-0.3425	1.26795
T3_M_02	26.34	25.115	-1.225			2.33755				-0.481111	1.39582									-0.3925	1.31267
T3_M_03	24.44	24.075	-0.365			1.28788				0.378889	0.76903									-0.8675	1.8245
T3_M_04	25.63	25.925	0.295			0.815072				1.03889	0.486702
T3_M_05	23.47	24.48	1.01			0.496546				1.75389	0.296501											-1.01664	0.13748
T3_M_06	26.325	25.195	-1.13			2.18859				-0.386111	1.30687									-1.0825	2.1177
T3_M_07	25.25	25.35	0.1			0.933033				0.843889	0.55714									-0.3725	1.29459
T3_M_08	26.55	25.44	-1.11			2.15846				-0.366111	1.28887									0.4875	0.71326
Media T3_M	25.5831	25.0381	-0.545		Medias	1.75511			-0.545											1.1475	0.451407
					Fold	0.872965	0.198889	0.871221				0.871221	0.230315							1.8625	0.274999
										-0.98	1.97247									-0.2775	1.21209
										0.1	0.933033									0.9525	0.516736
										0.925	0.526681									-0.2575	1.19541
										0.54	0.687771									-0.8075	1.75018
										0.31	0.806642									-2.0375	4.10534
										-1.04	2.05623									0.8525	0.553824
										-1.605	3.04196									-0.8525	1.80563
										-0.855	1.80876									-0.3725	1.29459
										0.815	0.568408									1.7625	0.294737
												-1.14781	0.292231							0.1375	0.909093
										-1.39	2.62079									-1.5525	2.93325
										-0.68	1.60214									0.0225	0.984525
										0.18	0.882703									0.3875	0.764453
										0.84	0.558644
										1.555	0.340329					-0.90421	-0.0238158	-1.01664				-1	0.232317
										-0.585	1.50004
										0.645	0.639493
										-0.565	1.47939
						-1.14552	-0.198889	-1.14781				-1	0.264358
Hembras
						T3_F Vs C_F
Tratamiento	M CT Act	M CT XXX	∆CT			2^(-∆CT)	∆∆CT	2^(-∆∆CT)	Media ∆CT	∆∆CT	2^(-∆∆CT)	Media Geo	Error
C_F_01	26.235	25.62	-0.615			1.53156				0.3805	0.768171
C_F_02	24.15	23.495	-0.655			1.57462				0.3405	0.789768
C_F_03	24.69	23.52	-1.17			2.25012				-0.1745	1.12857
C_F_04	24.6	24.415	-0.185			1.13682				0.8105	0.570184
C_F_05	25.365	23.43	-1.935			3.82378				-0.9395	1.91786
C_F_06	23.83	24.025	0.195			0.873573				1.1905	0.438151
C_F_07	25.455	24.025	-1.43			2.69447				-0.4345	1.35144
C_F_08	24.82	23.625	-1.195			2.28945				-0.1995	1.1483
C_F_09	26.005	24.76	-1.245			2.37019				-0.2495	1.1888
C_F_10	25.67	23.95	-1.72			3.29436				-0.7245	1.65233
Media C_F	25.082	24.0865	-0.9955		Medias/Fold	2.18389			-0.9955			1	0.148066
T3_F_01	25.965	24.305	-1.66			3.16017				-0.6645	1.58502
T3_F_02	26.225	23.335	-2.89			7.4127				-1.8945	3.71793
T3_F_03	24.625	24.625	0			1				0.9955	0.501562
T3_F_04	25.685	23.98	-1.705			3.26029				-0.7095	1.63524
T3_F_05	25.945	24.72	-1.225			2.33755				-0.2295	1.17243
T3_F_06	24.685	25.595	0.91			0.532185				1.9055	0.266924
T3_F_07	25.68	24.965	-0.715			1.64148				0.2805	0.823306
T3_F_08	25.945	23.54	-2.405			5.29636				-1.4095	2.65645
T3_F_09	25.655	24.825	-0.83			1.77769				0.1655	0.891619
T3_F_10	26.19	25.725	-0.465			1.38032				0.5305	0.692315
Media T3_F	25.66	24.5615	-1.0985		Medias	2.77987			-1.0985
					Fold	1.2729	-0.103	1.074				1.074	0.337892
										0.4835	0.71524
										0.4435	0.735348
										-0.0715	1.05081
										0.9135	0.530896
										-0.8365	1.78571
										1.2935	0.40796
										-0.3315	1.25832
										-0.0965	1.06918
										-0.1465	1.10688
										-0.6215	1.53847
												-0.931095	0.137863
										-0.5615	1.4758
										-1.7915	3.46175
										1.0985	0.467002
										-0.6065	1.52256
										-0.1265	1.09164
										2.0085	0.248531
										0.3835	0.766576
										-1.3065	2.47341
										0.2685	0.830182
										0.6335	0.644611
						-0.785609	0.103	-0.931095				-1	0.31461

## Sheet: ASIP
						Machos como tratamiento dentro de los controles										T3 vs Controles con independencia del sexo
Tratamiento	M CT Act	M CT ASIP	∆CT			2^(-∆CT)	∆∆CT	2^(-∆∆CT)	Media ∆CT	∆∆CT	2^(-∆∆CT)	Media Geo	Error			2^(-∆CT)	∆∆CT	2^(-∆∆CT)	Media ∆CT	∆∆CT	2^(-∆∆CT)	Media Geo	Error
C_M_01	25.965	24.44	-1.525			2.87787				-0.487222	1.40174					2.87787				-0.708235	1.6338
C_M_02	25.91	25.465	-0.445			1.36131				0.592778	0.663065					1.36131				0.371765	0.772837
C_M_03	25.245	25.625	0.38			0.768438				1.41778	0.374288					0.768438				1.19676	0.436252
C_M_04	25.13	25.125	-0.005			1.00347				1.03278	0.488768					1.00347				0.811765	0.569685
C_M_05	25.16	24.925	-0.235			1.17691				0.802778	0.573244					1.17691				0.581765	0.668146
C_M_06	25.92	24.335	-1.585			3.00008				-0.547222	1.46127					3.00008				-0.768235	1.70319
C_M_07	25.725	23.575				1										1
C_M_08	26.105	24.705	-1.4			2.63902				-0.362222	1.2854					2.63902				-0.583235	1.49821
C_M_09	24.665	24.935	0.27			0.82932				1.30778	0.403943					0.82932				1.08676	0.470816
Media C_M	25.5361	24.7922	-0.568125		Medias/Fold	1.62849			-0.568125			0.722138	0.16541			1
C_F_01	26.235	25.62				1										1.57462				0.161765	0.893931
C_F_02	24.15	23.495	-0.655			1.57462				0.382778	0.766959					2.25012				-0.353235	1.27742
C_F_03	24.69	23.52	-1.17			2.25012				-0.132222	1.09598					1.13682				0.631765	0.645386
C_F_04	24.6	24.415	-0.185			1.13682				0.852778	0.553718					3.82378				-1.11824	2.17081
C_F_05	25.365	23.43	-1.935			3.82378				-0.897222	1.86248					0.873573				1.01176	0.495939
C_F_06	23.83	24.025	0.195			0.873573				1.23278	0.425497					2.69447				-0.613235	1.52969
C_F_07	25.455	24.025	-1.43			2.69447				-0.392222	1.31241					2.28945				-0.378235	1.29975
C_F_08	24.82	23.625	-1.195			2.28945				-0.157222	1.11514					2.37019				-0.428235	1.34559
C_F_09	26.005	24.76	-1.245			2.37019				-0.207222	1.15446					3.29436				-0.903235	1.87026
C_F_10	25.67	23.95	-1.72			3.29436				-0.682222	1.60461
Media C_F	25.082	24.0865	-1.03778		Medias	2.13074			-1.03778						Medias/Fold	1.89283			-0.816765			1	0.133793
Media C	25.2971	24.4208	-0.816765		Fold	0.764285	0.251611	0.839958				1	0.155841			3.82378				-1.11824	2.17081
T3_M_01	26.66	24.725	-1.935							-0.956875	1.9411					2.33755				-0.408235	1.32706
T3_M_02	26.34	25.115	-1.225							0.123125	0.918197					1.28788				0.451765	0.731148
T3_M_03	24.44	24.075	-0.365							0.948125	0.518306					0.815072				1.11176	0.462728
T3_M_04	25.63	25.925	0.295							0.563125	0.676834					0.496546				1.82676	0.281896
T3_M_05	23.47	24.48	1.01							0.333125	0.793815					2.18859				-0.313235	1.24249
T3_M_06	26.325	25.195	-1.13							-1.01688	2.02353					0.933033				0.916765	0.529696
T3_M_07	25.25	25.35	0.1													2.15846				-0.293235	1.22539
T3_M_08	26.55	25.44	-1.11							-0.831875	1.78					3.16017				-0.843235	1.79407
Media T3_M	25.5831	25.0381	-0.545							0.838125	0.55937					7.4127				-2.07324	4.20829
T3_F_01	25.965	24.305	-1.66									-1	0.229057			1				0.816765	0.567714
T3_F_02	26.225	23.335	-2.89													3.26029				-0.888235	1.85091
T3_F_03	24.625	24.625	0							-0.086875	1.06207					2.33755				-0.408235	1.32706
T3_F_04	25.685	23.98	-1.705							-0.601875	1.51769					1
T3_F_05	25.945	24.72	-1.225							0.383125	0.766775					1.64148				0.101765	0.931892
T3_F_06	24.685	25.595														5.29636				-1.58824	3.00681
T3_F_07	25.68	24.965	-0.715							0.763125	0.589219					1.77769				-0.0132353	1.00922
T3_F_08	25.945	23.54	-2.405							-0.861875	1.8174					1
T3_F_09	25.655	24.825	-0.83							-0.626875	1.54422
T3_F_10	26.19	25.725													Medias	2.32929			-0.986875
Media T3_F	25.66	24.5615	-1.42875							-1.15187	2.22202				Fold	1.23058	0.0238158	0.983628				1.12514	0.257233
Media T3	25.6258	24.7733	-0.986875																	-0.538125	1.45208
						-1.30841	-0.251611	-1.19054				-1.24132	0.220707							0.541875	0.686878
																				1.36688	0.38773
Machos																				0.981875	0.506321
						T3_M Vs C_M														0.751875	0.593831
Tratamiento	M CT Act	M CT ASIP	∆CT			2^(-∆CT)	∆∆CT	2^(-∆∆CT)	Media ∆CT	∆∆CT	2^(-∆∆CT)	Media Geo	Error							-0.598125	1.51375
C_M_01	25.965	24.44	-1.525			2.87787				-0.956875	1.9411
C_M_02	25.91	25.465	-0.445			1.36131				0.123125	0.918197									-0.413125	1.33157
C_M_03	25.245	25.625	0.38			0.768438				0.948125	0.518306									1.25688	0.418449
C_M_04	25.13	25.125	-0.005			1.00347				0.563125	0.676834
C_M_05	25.16	24.925	-0.235			1.17691				0.333125	0.793815									0.331875	0.794503
C_M_06	25.92	24.335	-1.585			3.00008				-1.01688	2.02353									-0.183125	1.13534
C_M_07	25.725	23.575				1														0.801875	0.573603
C_M_08	26.105	24.705	-1.4			2.63902				-0.831875	1.78									-0.948125	1.92936
C_M_09	24.665	24.935	0.27			0.82932				0.838125	0.55937									1.18188	0.440778
Media C_M	25.5361	24.7922	-0.568125		Medias/Fold	1.62849			-0.568125			1	0.229057							-0.443125	1.35955
T3_M_01	26.66	24.725	-1.935			3.82378				-1.36687	2.57911									-0.208125	1.15519
T3_M_02	26.34	25.115	-1.225			2.33755				-0.656875	1.57666									-0.258125	1.19592
T3_M_03	24.44	24.075	-0.365			1.28788				0.203125	0.868667									-0.733125	1.66224
T3_M_04	25.63	25.925	0.295			0.815072				0.863125	0.54976
T3_M_05	23.47	24.48	1.01			0.496546				1.57813	0.334917											-0.888775	0.118911
T3_M_06	26.325	25.195	-1.13			2.18859				-0.561875	1.47619									-0.948125	1.92936
T3_M_07	25.25	25.35	0.1			0.933033				0.668125	0.629324									-0.238125	1.17946
T3_M_08	26.55	25.44	-1.11			2.15846				-0.541875	1.45586									0.621875	0.649826
Media T3_M	25.5831	25.0381	-0.545		Medias	1.75511			-0.545											1.28187	0.411261
					Fold	1.07776	0.198889	0.871221				0.984099	0.260155							1.99688	0.250542
										-0.98	1.97247									-0.143125	1.10429
										0.1	0.933033									1.08688	0.47078
										0.925	0.526681									-0.123125	1.08909
										0.54	0.687771									-0.673125	1.59452
										0.31	0.806642									-1.90313	3.74022
										-1.04	2.05623									0.986875	0.50457
										0.545	0.685391									-0.718125	1.64504
										-0.855	1.80876									-0.238125	1.17946
										0.815	0.568408
												-0.972655	0.212218							0.271875	0.828242
										-1.39	2.62079									-1.41813	2.67238
										-0.68	1.60214									0.156875	0.896966
										0.18	0.882703
										0.84	0.558644
										1.555	0.340329					-0.812623	-0.0238158	-1.01664				-1	0.228623
										-0.585	1.50004
										0.645	0.639493
										-0.565	1.47939
						-0.927854	-0.198889	-1.14781				-1	0.264358
Hembras
						T3_F Vs C_F
Tratamiento	M CT Act	M CT ASIP	∆CT			2^(-∆CT)	∆∆CT	2^(-∆∆CT)	Media ∆CT	∆∆CT	2^(-∆∆CT)	Media Geo	Error
C_F_01	26.235	25.62				1
C_F_02	24.15	23.495	-0.655			1.57462				0.382778	0.766959
C_F_03	24.69	23.52	-1.17			2.25012				-0.132222	1.09598
C_F_04	24.6	24.415	-0.185			1.13682				0.852778	0.553718
C_F_05	25.365	23.43	-1.935			3.82378				-0.897222	1.86248
C_F_06	23.83	24.025	0.195			0.873573				1.23278	0.425497
C_F_07	25.455	24.025	-1.43			2.69447				-0.392222	1.31241
C_F_08	24.82	23.625	-1.195			2.28945				-0.157222	1.11514
C_F_09	26.005	24.76	-1.245			2.37019				-0.207222	1.15446
C_F_10	25.67	23.95	-1.72			3.29436				-0.682222	1.60461
Media C_F	25.082	24.0865	-1.03778		Medias/Fold	2.13074			-1.03778			1	0.155841
T3_F_01	25.965	24.305	-1.66			3.16017				-0.622222	1.53924
T3_F_02	26.225	23.335	-2.89			7.4127				-1.85222	3.61056
T3_F_03	24.625	24.625	0			1				1.03778	0.487077
T3_F_04	25.685	23.98	-1.705			3.26029				-0.667222	1.58801
T3_F_05	25.945	24.72	-1.225			2.33755				-0.187222	1.13857
T3_F_06	24.685	25.595				1
T3_F_07	25.68	24.965	-0.715			1.64148				0.322778	0.799529
T3_F_08	25.945	23.54	-2.405			5.29636				-1.36722	2.57973
T3_F_09	25.655	24.825	-0.83			1.77769				0.207778	0.86587
T3_F_10	26.19	25.725				1
Media T3_F	25.66	24.5615	-1.42875		Medias	2.78862			-1.42875
					Fold	1.30876	-0.103	1.074				1.31128	0.369186
										1.42875	0.371453
										0.77375	0.584895
										0.25875	0.835812
										1.24375	0.422274
										-0.50625	1.42035
										1.62375	0.324491
										-0.00125	1.00087
										0.23375	0.850422
										0.18375	0.880412
										-0.29125	1.2237
												-0.709685	0.116093
										-0.23125	1.17385
										-1.46125	2.75347
										1.42875	0.371453
										-0.27625	1.21104
										0.20375	0.868291
										0.71375	0.609733
										-0.97625	1.96735
										0.59875	0.660326
						-0.764082	0.103	-0.931095				-1	0.281547

## Sheet: dct
						Machos como tratamiento dentro de los controles										T3 vs Controles con independencia del sexo
Tratamiento	M CT Act	M CT dct	∆CT			2^(-∆CT)	∆∆CT	2^(-∆∆CT)	Media ∆CT	∆∆CT	2^(-∆∆CT)	Media Geo	Error			2^(-∆CT)	∆∆CT	2^(-∆∆CT)	Media ∆CT	∆∆CT	2^(-∆∆CT)	Media Geo	Error
C_M_01	25.965	29.85				1										1
C_M_02	25.91	31.985	6.075			0.0148335				1.60571	0.328573					0.0148335				0.788	0.579146
C_M_03	25.245	30.02	4.775			0.0365243				0.305714	0.809042					0.0365243				-0.512	1.42603
C_M_04	25.13	31.45	6.32			0.0125167				1.85071	0.277255					0.0125167				1.033	0.488693
C_M_05	25.16	32.41	7.25			0.0065695				2.78071	0.14552					0.0065695				1.963	0.256495
C_M_06	25.92	31.375	5.455			0.0227972				0.985714	0.504976					0.0227972				0.168	0.890076
C_M_07	25.725	31.855	6.13			0.0142786				1.66071	0.316283					0.0142786				0.843	0.557483
C_M_08	26.105	31.375	5.27			0.0259162				0.800714	0.574065					0.0259162				-0.017	1.01185
C_M_09	24.665	31.41	6.745			0.00932294				2.27571	0.20651					0.00932294				1.458	0.363997
Media C_M	25.5361	31.3033	6.0025		Medias/Fold	0.126973			6.0025			0.345507	0.0776704			1
C_F_01	26.235	31.34				1										0.0390103				-0.607	1.52309
C_F_02	24.15	28.83	4.68			0.0390103				0.210714	0.864109					0.036272				-0.502	1.41618
C_F_03	24.69	29.475	4.785			0.036272				0.315714	0.803453					0.0253829				0.013	0.99103
C_F_04	24.6	29.9	5.3			0.0253829				0.830714	0.562251					1
C_F_05	25.365	31.555				1										0.042837				-0.742	1.67249
C_F_06	23.83	28.375	4.545			0.042837				0.0757143	0.948872					0.0780207				-1.607	3.04618
C_F_07	25.455	29.135	3.68			0.0780207				-0.789286	1.72822					1
C_F_08	24.82	31.08				1										0.0934281				-1.867	3.64773
C_F_09	26.005	29.425	3.42			0.0934281				-1.04929	2.0695					0.0340784				-0.412	1.33053
C_F_10	25.67	30.545	4.875			0.0340784				0.405714	0.754862
Media C_F	25.082	29.966	4.46929		Medias	0.334903			4.46929						Medias/Fold	0.23641			5.287			1	0.247026
Media C	25.2971	30.5995	5.287		Fold	0.379134	0.883222	0.542155				1	0.213206			0.0396922				-0.632	1.54971
T3_M_01	26.66	31.315	4.655													1
T3_M_02	26.34	28.37								0.0725	0.950989					0.0164588				0.638	0.642603
T3_M_03	24.44	30.365	5.925							-1.2275	2.34161					0.0337259				-0.397	1.31677
T3_M_04	25.63	30.52	4.89							0.3175	0.802459					0.00427458				2.583	0.166894
T3_M_05	23.47	31.34	7.87							1.2475	0.421177					0.0220206				0.218	0.859756
T3_M_06	26.325	31.83	5.505							-0.5475	1.46155					0.027489				-0.102	1.07326
T3_M_07	25.25	30.435	5.185							0.1275	0.915416					0.0347944				-0.442	1.35849
T3_M_08	26.55	31.395	4.845							-0.7325	1.66152					0.411796				-4.007	16.0778
Media T3_M	25.5831	30.6963	5.55357							0.7425	0.597703					1
T3_F_01	25.965	27.245	1.28									-1	0.224801			0.0555527				-1.117	2.16895
T3_F_02	26.225	32.34														0.0804926				-1.652	3.14269
T3_F_03	24.625	28.795	4.17							-1.3225	2.50099					0.0593339				-1.212	2.31659
T3_F_04	25.685	29.32	3.635							-1.2175	2.32543					0.075363				-1.557	2.94241
T3_F_05	25.945	30.02	4.075							-0.7025	1.62732					1
T3_F_06	24.685	28.415	3.73													1
T3_F_07	25.68	31.21								-1.4575	2.74632					0.0756246				-1.562	2.95263
T3_F_08	25.945	31.085								-2.3225	5.00198					0.237336				-3.212	9.26634
T3_F_09	25.655	29.38	3.725
T3_F_10	26.19	28.265	2.075							-2.5825	5.98977				Medias	0.287442			4.3975
Media T3_F	25.66	29.6075	3.24143							-1.1275	2.1848				Fold	1.21586	-0.836813	1.7861				1.85253	1.14819
Media T3	25.6258	30.0914	4.3975
						-2.63759	-0.883222	-1.84449				-2.8943	0.617081							1.6775	0.312624
																				0.3775	0.76977
Machos																				1.9225	0.263797
						T3_M Vs C_M														2.8525	0.138456
Tratamiento	M CT Act	M CT dct	∆CT			2^(-∆CT)	∆∆CT	2^(-∆∆CT)	Media ∆CT	∆∆CT	2^(-∆∆CT)	Media Geo	Error							1.0575	0.480464
C_M_01	25.965	29.85				1														1.7325	0.30093
C_M_02	25.91	31.985	6.075			0.0148335				0.0725	0.950989									0.8725	0.5462
C_M_03	25.245	30.02	4.775			0.0365243				-1.2275	2.34161									2.3475	0.196486
C_M_04	25.13	31.45	6.32			0.0125167				0.3175	0.802459
C_M_05	25.16	32.41	7.25			0.0065695				1.2475	0.421177									0.2825	0.822165
C_M_06	25.92	31.375	5.455			0.0227972				-0.5475	1.46155									0.3875	0.764453
C_M_07	25.725	31.855	6.13			0.0142786				0.1275	0.915416									0.9025	0.534959
C_M_08	26.105	31.375	5.27			0.0259162				-0.7325	1.66152
C_M_09	24.665	31.41	6.745			0.00932294				0.7425	0.597703									0.1475	0.902814
Media C_M	25.5361	31.3033	6.0025		Medias/Fold	0.126973			6.0025			1	0.224801							-0.7175	1.64433
T3_M_01	26.66	31.315	4.655			0.0396922				-1.3475	2.54471
T3_M_02	26.34	28.37				1														-0.9775	1.96905
T3_M_03	24.44	30.365	5.925			0.0164588				-0.0775	1.05519									0.4775	0.718221
T3_M_04	25.63	30.52	4.89			0.0337259				-1.1125	2.1622
T3_M_05	23.47	31.34	7.87			0.00427458				1.8675	0.274048											-0.539801	0.133345
T3_M_06	26.325	31.83	5.505			0.0220206				-0.4975	1.41177									0.2575	0.836536
T3_M_07	25.25	30.435	5.185			0.027489				-0.8175	1.76235
T3_M_08	26.55	31.395	4.845			0.0347944				-1.1575	2.23071									1.5275	0.346878
Media T3_M	25.5831	30.6963	5.55357		Medias	0.147307			5.55357											0.4925	0.710792
					Fold	1.16014	-0.654097	1.57363				1.36503	0.297401							3.4725	0.0900893
										-5.55357	46.9669									1.1075	0.464098
										0.521429	0.696682									0.7875	0.579347
										-0.778571	1.71543									0.4475	0.733312
										0.766429	0.587871									-3.1175	8.67883
										1.69643	0.308549
										-0.0985714	1.07071									-0.2275	1.1708
										0.576429	0.670622									-0.7625	1.69643
										-0.283571	1.2172									-0.3225	1.2505
										1.19143	0.437869									-0.6675	1.58832
												-1.16313	5.12747
										-0.898571	1.86422
										-5.55357	46.9669									-0.6725	1.59383
										0.371429	0.773017									-2.3225	5.00198
										-0.663571	1.584
										2.31643	0.200764					-0.822462	0.836813	-0.559879				-1	0.619794
										-0.0485714	1.03424
										-0.368571	1.29107
										-0.708571	1.63419
						-0.861964	0.654097	-0.635473				-1.61798	5.7243
Hembras
						T3_F Vs C_F
Tratamiento	M CT Act	M CT dct	∆CT			2^(-∆CT)	∆∆CT	2^(-∆∆CT)	Media ∆CT	∆∆CT	2^(-∆∆CT)	Media Geo	Error
C_F_01	26.235	31.34				1
C_F_02	24.15	28.83	4.68			0.0390103				0.210714	0.864109
C_F_03	24.69	29.475	4.785			0.036272				0.315714	0.803453
C_F_04	24.6	29.9	5.3			0.0253829				0.830714	0.562251
C_F_05	25.365	31.555				1
C_F_06	23.83	28.375	4.545			0.042837				0.0757143	0.948872
C_F_07	25.455	29.135	3.68			0.0780207				-0.789286	1.72822
C_F_08	24.82	31.08				1
C_F_09	26.005	29.425	3.42			0.0934281				-1.04929	2.0695
C_F_10	25.67	30.545	4.875			0.0340784				0.405714	0.754862
Media C_F	25.082	29.966	4.46929		Medias/Fold	0.334903			4.46929			1	0.213206
T3_F_01	25.965	27.245	1.28			0.411796				-3.18929	9.12159
T3_F_02	26.225	32.34				1
T3_F_03	24.625	28.795	4.17			0.0555527				-0.299286	1.23054
T3_F_04	25.685	29.32	3.635			0.0804926				-0.834286	1.78297
T3_F_05	25.945	30.02	4.075			0.0593339				-0.394286	1.31429
T3_F_06	24.685	28.415	3.73			0.075363				-0.739286	1.66935
T3_F_07	25.68	31.21				1
T3_F_08	25.945	31.085				1
T3_F_09	25.655	29.38	3.725			0.0756246				-0.744286	1.67514
T3_F_10	26.19	28.265	2.075			0.237336				-2.39429	5.25717
Media T3_F	25.66	29.6075	3.24143		Medias	0.39955			3.24143
					Fold	1.19303	-0.9365	1.91388				2.34219	1.12748
										1.43857	0.368932
										1.54357	0.343035
										2.05857	0.240054
										1.30357	0.405122
										0.438571	0.737865
										0.178571	0.883577
										1.63357	0.322289
												-0.426951	0.0910283
										-1.96143	3.89447
										0.928571	0.525378
										0.393571	0.761243
										0.833571	0.561138
										0.488571	0.712731
										0.483571	0.715205
										-1.16643	2.24455
						-0.838201	0.9365	-0.522499				-1	0.481377

## Sheet: foxd3
						Machos como tratamiento dentro de los controles										T3 vs Controles con independencia del sexo
Tratamiento	M CT Act	M CT foxd3	∆CT			2^(-∆CT)	∆∆CT	2^(-∆∆CT)	Media ∆CT	∆∆CT	2^(-∆∆CT)	Media Geo	Error			2^(-∆CT)	∆∆CT	2^(-∆∆CT)	Media ∆CT	∆∆CT	2^(-∆∆CT)	Media Geo	Error
C_M_01	25.965	27.76	1.795			0.288172				-0.152	1.11111					0.288172				-0.160526	1.11769
C_M_02	25.91	27.55	1.64			0.320856				-0.307	1.23713					0.320856				-0.315526	1.24447
C_M_03	25.245	27.3	2.055			0.240649				0.108	0.927873					0.240649				0.0994737	0.933373
C_M_04	25.13	26.69	1.56			0.339151				-0.387	1.30767					0.339151				-0.395526	1.31542
C_M_05	25.16	27.57	2.41			0.188156				0.463	0.725476					0.188156				0.454474	0.729776
C_M_06	25.92	27.29	1.37			0.386891				-0.577	1.49174					0.386891				-0.585526	1.50059
C_M_07	25.725	27.4	1.675			0.313166				-0.272	1.20748					0.313166				-0.280526	1.21464
C_M_08	26.105	27.62	1.515			0.349896				-0.432	1.3491					0.349896				-0.440526	1.3571
C_M_09	24.665	28.33	3.665			0.0788361				1.718	0.30397					0.0788361				1.70947	0.305772
Media C_M	25.5361	27.5011	1.965		Medias/Fold	0.278419			1.965			0.987601	0.122835			0.292194				-0.180526	1.1333
C_F_01	26.235	28.01	1.775			0.292194				-0.172	1.12662					0.128514				1.00447	0.498452
C_F_02	24.15	27.11	2.96			0.128514				1.013	0.495515					0.25				0.0444737	0.969643
C_F_03	24.69	26.69	2			0.25				0.053	0.96393					0.25				0.0444737	0.969643
C_F_04	24.6	26.6	2			0.25				0.053	0.96393					0.337978				-0.390526	1.31087
C_F_05	25.365	26.93	1.565			0.337978				-0.382	1.30315					0.105112				1.29447	0.407685
C_F_06	23.83	27.08	3.25			0.105112				1.303	0.405283					0.50874				-0.980526	1.97319
C_F_07	25.455	26.43	0.975			0.50874				-0.972	1.96156					0.246558				0.0644737	0.956294
C_F_08	24.82	26.84	2.02			0.246558				0.073	0.950659					0.421908				-0.710526	1.6364
C_F_09	26.005	27.25	1.245			0.421908				-0.702	1.62676					0.312083				-0.275526	1.21044
C_F_10	25.67	27.35	1.68			0.312083				-0.267	1.2033
Media C_F	25.082	27.029	1.947		Medias	0.285309			1.947						Medias/Fold	0.282045			1.95553			1	0.0952985
Media C	25.2971	27.2526	1.95553		Fold	0.975853	0.018	0.987601				1	0.148315			0.343885				-0.415526	1.33379
T3_M_01	26.66	28.2	1.54							-0.17	1.12506					0.426317				-0.725526	1.6535
T3_M_02	26.34	27.57	1.23							-0.325	1.25266					0.142595				0.854474	0.553067
T3_M_03	24.44	27.25	2.81							0.09	0.939523					0.266093				-0.0455263	1.03206
T3_M_04	25.63	27.54	1.91							-0.405	1.32409					0.124137				1.05447	0.481473
T3_M_05	23.47	26.48	3.01							0.445	0.734584					0.51943				-1.01053	2.01465
T3_M_06	26.325	27.27	0.945							-0.595	1.51047					0.353553				-0.455526	1.37128
T3_M_07	25.25	26.75	1.5							-0.29	1.22264					0.558644				-1.11553	2.16674
T3_M_08	26.55	27.39	0.84							-0.45	1.36604					0.252613				0.0294737	0.979778
Media T3_M	25.5831	27.3062	1.72312							1.7	0.307786					0.388234				-0.590526	1.5058
T3_F_01	25.965	27.95	1.985									-1	0.124377			0.256139				0.00947368	0.993455
T3_F_02	26.225	27.59	1.365							-0.19	1.14076					0.288172				-0.160526	1.11769
T3_F_03	24.625	26.59	1.965							0.995	0.501736					0.319746				-0.310526	1.24016
T3_F_04	25.685	27.48	1.795							0.035	0.976032					0.270744				-0.0705263	1.0501
T3_F_05	25.945	27.59	1.645							0.035	0.976032					0.378929				-0.555526	1.4697
T3_F_06	24.685	26.57	1.885							-0.4	1.31951					1.09051				-2.08053	4.22961
T3_F_07	25.68	27.08	1.4							1.285	0.410371					0.685391				-1.41053	2.65834
T3_F_08	25.945	25.82	-0.125							-0.99	1.98618					0.20733				0.314474	0.804144
T3_F_09	25.655	26.2	0.545							0.055	0.962594
T3_F_10	26.19	28.46	2.27							-0.72	1.64718				Medias	0.381803			1.58417
Media T3_F	25.66	27.133	1.473							-0.285	1.21841				Fold	1.3537	-0.37136	1.29357				1.29357	0.207259
Media T3	25.6258	27.21	1.58417																	0.210833	0.864038
						-1.02474	-0.018	-1.01255				-1.01255	0.150178							0.0558333	0.962039
																				0.470833	0.721548
Machos																				-0.0241667	1.01689
						T3_M Vs C_M														0.825833	0.564156
Tratamiento	M CT Act	M CT foxd3	∆CT			2^(-∆CT)	∆∆CT	2^(-∆∆CT)	Media ∆CT	∆∆CT	2^(-∆∆CT)	Media Geo	Error							-0.214167	1.16003
C_M_01	25.965	27.76	1.795			0.288172				-0.17	1.12506									0.0908333	0.93898
C_M_02	25.91	27.55	1.64			0.320856				-0.325	1.25266									-0.0691667	1.04911
C_M_03	25.245	27.3	2.055			0.240649				0.09	0.939523									2.08083	0.236378
C_M_04	25.13	26.69	1.56			0.339151				-0.405	1.32409									0.190833	0.8761
C_M_05	25.16	27.57	2.41			0.188156				0.445	0.734584									1.37583	0.38533
C_M_06	25.92	27.29	1.37			0.386891				-0.595	1.51047									0.415833	0.749586
C_M_07	25.725	27.4	1.675			0.313166				-0.29	1.22264									0.415833	0.749586
C_M_08	26.105	27.62	1.515			0.349896				-0.45	1.36604									-0.0191667	1.01337
C_M_09	24.665	28.33	3.665			0.0788361				1.7	0.307786									1.66583	0.315162
Media C_M	25.5361	27.5011	1.965		Medias/Fold	0.278419			1.965			1	0.124377							-0.609167	1.52538
T3_M_01	26.66	28.2	1.54			0.343885				-0.425	1.34257									0.435833	0.739267
T3_M_02	26.34	27.57	1.23			0.426317				-0.735	1.6644									-0.339167	1.26503
T3_M_03	24.44	27.25	2.81			0.142595				0.845	0.556711									0.0958333	0.935732
T3_M_04	25.63	27.54	1.91			0.266093				-0.055	1.03886
T3_M_05	23.47	26.48	3.01			0.124137				1.045	0.484645											-0.773054	0.0736709
T3_M_06	26.325	27.27	0.945			0.51943				-1.02	2.02792									-0.0441667	1.03109
T3_M_07	25.25	26.75	1.5			0.353553				-0.465	1.38032									-0.354167	1.27825
T3_M_08	26.55	27.39	0.84			0.558644				-1.125	2.18102									1.22583	0.42755
Media T3_M	25.5831	27.3062	1.72312		Medias	0.341832			1.72312											0.325833	0.797837
					Fold	1.22776	-0.241875	1.18253				1.18253	0.220512							1.42583	0.372204
										0.071875	0.951401									-0.639167	1.55743
										-0.083125	1.05931									-0.0841667	1.06008
										0.331875	0.794503									-0.744167	1.67501
										-0.163125	1.11971									0.400833	0.757421
										0.686875	0.621198									-0.219167	1.16406
										-0.353125	1.27732									0.380833	0.767994
										-0.048125	1.03392									0.210833	0.864038
										-0.208125	1.15519									0.0608333	0.95871
										1.94187	0.260278									0.300833	0.811783
												-0.845646	0.105179							-0.184167	1.13616
										-0.183125	1.13534									-1.70917	3.26972
										-0.493125	1.40749									-1.03917	2.05504
										1.08688	0.47078									0.685833	0.621647
										0.186875	0.878507
										1.28688	0.409838					-0.738719	0.37136	-0.773054				-1	0.160222
										-0.778125	1.7149
										-0.223125	1.16726
										-0.883125	1.84437
						-0.814492	0.241875	-0.845646				-1	0.186475
Hembras
						T3_F Vs C_F
Tratamiento	M CT Act	M CT foxd3	∆CT			2^(-∆CT)	∆∆CT	2^(-∆∆CT)	Media ∆CT	∆∆CT	2^(-∆∆CT)	Media Geo	Error
C_F_01	26.235	28.01	1.775			0.292194				-0.172	1.12662
C_F_02	24.15	27.11	2.96			0.128514				1.013	0.495515
C_F_03	24.69	26.69	2			0.25				0.053	0.96393
C_F_04	24.6	26.6	2			0.25				0.053	0.96393
C_F_05	25.365	26.93	1.565			0.337978				-0.382	1.30315
C_F_06	23.83	27.08	3.25			0.105112				1.303	0.405283
C_F_07	25.455	26.43	0.975			0.50874				-0.972	1.96156
C_F_08	24.82	26.84	2.02			0.246558				0.073	0.950659
C_F_09	26.005	27.25	1.245			0.421908				-0.702	1.62676
C_F_10	25.67	27.35	1.68			0.312083				-0.267	1.2033
Media C_F	25.082	27.029	1.947		Medias/Fold	0.285309			1.947			1	0.148315
T3_F_01	25.965	27.95	1.985			0.252613				0.038	0.974004
T3_F_02	26.225	27.59	1.365			0.388234				-0.582	1.49692
T3_F_03	24.625	26.59	1.965			0.256139				0.018	0.987601
T3_F_04	25.685	27.48	1.795			0.288172				-0.152	1.11111
T3_F_05	25.945	27.59	1.645			0.319746				-0.302	1.23285
T3_F_06	24.685	26.57	1.885			0.270744				-0.062	1.04391
T3_F_07	25.68	27.08	1.4			0.378929				-0.547	1.46104
T3_F_08	25.945	25.82	-0.125			1.09051				-2.072	4.20469
T3_F_09	25.655	26.2	0.545			0.685391				-1.402	2.64268
T3_F_10	26.19	28.46	2.27			0.20733				0.323	0.799406
Media T3_F	25.66	27.133	1.473		Medias	0.413781			1.473
					Fold	1.45029	-0.474	1.38896				1.38896	0.333204
										0.302	0.811127
										1.487	0.356754
										0.527	0.693996
										0.527	0.693996
										0.092	0.938221
										1.777	0.29179
										-0.498	1.41225
										0.547	0.684442
										-0.228	1.17121
										0.207	0.866337
												-0.719966	0.106782
										0.512	0.70125
										-0.108	1.07773
										0.492	0.711039
										0.322	0.79996
										0.172	0.887611
										0.412	0.751581
										-0.073	1.0519
										-1.598	3.02723
										-0.928	1.90264
										0.797	0.575545
						-0.689517	0.474	-0.719966				-1	0.239895

## Sheet: Kita
						Machos como tratamiento dentro de los controles										T3 vs Controles con independencia del sexo
Tratamiento	M CT Act	M CT Kita	∆CT			2^(-∆CT)	∆∆CT	2^(-∆∆CT)	Media ∆CT	∆∆CT	2^(-∆∆CT)	Media Geo	Error			2^(-∆CT)	∆∆CT	2^(-∆∆CT)	Media ∆CT	∆∆CT	2^(-∆∆CT)	Media Geo	Error
C_M_01	25.965	25.12	-0.845			1.79626				-0.838889	1.78867					1.79626				-0.585	1.50004
C_M_02	25.91	25.125	-0.785			1.72309				-0.778889	1.71581					1.72309				-0.525	1.43893
C_M_03	25.245	24.04	-1.205			2.30537				-1.19889	2.29563					2.30537				-0.945	1.92519
C_M_04	25.13	25.14	0.01			0.993092				0.0161111	0.988895					0.993092				0.27	0.82932
C_M_05	25.16	25.31	0.15			0.90125				0.156111	0.897441					0.90125				0.41	0.752623
C_M_06	25.92	25.07	-0.85			1.8025				-0.843889	1.79488					1.8025				-0.59	1.50525
C_M_07	25.725	25.545	-0.18			1.13288				-0.173889	1.1281					1.13288				0.08	0.946058
C_M_08	26.105	25.445	-0.66			1.58008				-0.653889	1.5734					1.58008				-0.4	1.31951
C_M_09	24.665	26.03				1										1
Media C_M	25.5361	25.2028	-0.545625		Medias/Fold	1.4705			-0.545625			1.45348	0.169754			1.56374				-0.385	1.30586
C_F_01	26.235	25.59	-0.645			1.56374				-0.638889	1.55713					0.582367				1.04	0.486327
C_F_02	24.15	24.93	0.78			0.582367				0.786111	0.579905					1.67597				-0.485	1.39959
C_F_03	24.69	23.945	-0.745			1.67597				-0.738889	1.66889					0.580352				1.045	0.484645
C_F_04	24.6	25.385	0.785			0.580352				0.791111	0.577899					1.26576				-0.08	1.05702
C_F_05	25.365	25.025	-0.34			1.26576				-0.333889	1.26041					1
C_F_06	23.83	25.955				1										1.26576				-0.08	1.05702
C_F_07	25.455	25.115	-0.34			1.26576				-0.333889	1.26041					0.843816				0.505	0.70466
C_F_08	24.82	25.065	0.245			0.843816				0.251111	0.840249					1.09051				0.135	0.91067
C_F_09	26.005	25.88	-0.125			1.09051				-0.118889	1.0859					0.795536				0.59	0.664343
C_F_10	25.67	26	0.33			0.795536				0.336111	0.792174
Media C_F	25.082	25.289	-0.00611111		Medias	1.06638			-0.00611111						Medias/Fold	1.25781			-0.26			1	0.0986839
Media C	25.2971	25.2482	-0.26		Fold	1.37897	-0.540333	1.45431				1	0.133388			2.34567				-0.97	1.95884
T3_M_01	26.66	25.43	-1.23							-0.299375	1.23061					1.95884				-0.71	1.6358
T3_M_02	26.34	25.37	-0.97							-0.239375	1.18048					0.699793				0.775	0.584389
T3_M_03	24.44	24.955	0.515							-0.659375	1.5794					0.82932				0.53	0.692555
T3_M_04	25.63	25.9	0.27							0.555625	0.680362					0.378929				1.66	0.316439
T3_M_05	23.47	24.87	1.4							0.695625	0.617442					1.45397				-0.28	1.21419
T3_M_06	26.325	25.785	-0.54							-0.304375	1.23488					1.32869				-0.15	1.10957
T3_M_07	25.25	24.84	-0.41							0.365625	0.776133					1.63014				-0.445	1.36131
T3_M_08	26.55	25.845	-0.705							-0.114375	1.08251					1.54221				-0.365	1.28788
Media T3_M	25.5831	25.3744	-0.20875													3.5186				-1.555	2.93834
T3_F_01	25.965	25.34	-0.625									-1	0.116791			1.28788				-0.105	1.07549
T3_F_02	26.225	24.41	-1.815							-0.099375	1.07131					1.68179				-0.49	1.40444
T3_F_03	24.625	24.26	-0.365							1.32563	0.398976					1.97931				-0.725	1.6529
T3_F_04	25.685	24.935	-0.75							-0.199375	1.1482					0.965936				0.31	0.806642
T3_F_05	25.945	24.96	-0.985							1.33062	0.397596					1.52626				-0.35	1.27456
T3_F_06	24.685	24.735	0.05							0.205625	0.867163					0.972655				0.3	0.812252
T3_F_07	25.68	25.07	-0.61													1.12896				0.085	0.942785
T3_F_08	25.945	25.985	0.04							0.205625	0.867163					4.09823				-1.775	3.42238
T3_F_09	25.655	25.48	-0.175							0.790625	0.578094
T3_F_10	26.19	24.155	-2.035							0.420625	0.747101				Medias	1.62929			-0.496667
Media T3_F	25.66	24.933	-0.727							0.875625	0.545018				Fold	1.29534	-0.447719	1.36388				1.17827	0.184008
Media T3	25.6258	25.1292	-0.496667																	-0.348333	1.27309
						-0.72518	0.540333	-0.687612				-0.688003	0.0917713							-0.288333	1.22123
																				-0.708333	1.63392
Machos																				0.506667	0.703847
						T3_M Vs C_M														0.646667	0.638754
Tratamiento	M CT Act	M CT Kita	∆CT			2^(-∆CT)	∆∆CT	2^(-∆∆CT)	Media ∆CT	∆∆CT	2^(-∆∆CT)	Media Geo	Error							-0.353333	1.27751
C_M_01	25.965	25.12	-0.845			1.79626				-0.511667	1.4257									0.316667	0.802923
C_M_02	25.91	25.125	-0.785			1.72309				-0.451667	1.36762									-0.163333	1.11987
C_M_03	25.245	24.04	-1.205			2.30537				-0.871667	1.82978									0.496667	0.708742
C_M_04	25.13	25.14	0.01			0.993092				0.343333	0.788218									-0.148333	1.10829
C_M_05	25.16	25.31	0.15			0.90125				0.483333	0.715323									1.27667	0.412748
C_M_06	25.92	25.07	-0.85			1.8025				-0.516667	1.43065									-0.248333	1.18783
C_M_07	25.725	25.545	-0.18			1.13288				0.153333	0.899171									1.28167	0.41132
C_M_08	26.105	25.445	-0.66			1.58008				-0.326667	1.25411									0.156667	0.897095
C_M_09	24.665	26.03	1.365			0.388234				1.69833	0.308142									0.496667	0.708742
Media C_M	25.5361	25.2028	-0.333333		Medias/Fold	1.40253			-0.333333			1	0.156096							0.156667	0.897095
T3_M_01	26.66	25.43	-1.23			2.34567				-0.896667	1.86176									0.741667	0.598048
T3_M_02	26.34	25.37	-0.97			1.95884				-0.636667	1.55473									0.371667	0.772889
T3_M_03	24.44	24.955	0.515			0.699793				0.848333	0.555426									0.826667	0.56383
T3_M_04	25.63	25.9	0.27			0.82932				0.603333	0.658231
T3_M_05	23.47	24.87	1.4			0.378929				1.73333	0.300756											-0.832756	0.0761387
T3_M_06	26.325	25.785	-0.54			1.45397				-0.206667	1.15402									-0.733333	1.66248
T3_M_07	25.25	24.84	-0.41			1.32869				-0.0766667	1.05458									-0.473333	1.38831
T3_M_08	26.55	25.845	-0.705			1.63014				-0.371667	1.29385									1.01167	0.495973
Media T3_M	25.5831	25.3744	-0.20875		Medias	1.32817			-0.20875											0.766667	0.587774
					Fold	0.946981	0.124583	0.917269				0.917269	0.186285							1.89667	0.268563
										-0.63625	1.55428									-0.0433333	1.03049
										-0.57625	1.49097									0.0866667	0.941696
										-0.99625	1.99481									-0.208333	1.15535
										0.21875	0.85931									-0.128333	1.09303
										0.35875	0.77984									-1.31833	2.49378
										-0.64125	1.55968									0.131667	0.912776
										0.02875	0.980269									-0.253333	1.19196
										-0.45125	1.36722									-0.488333	1.40282
										1.57375	0.335934									0.546667	0.6846
												-1.09019	0.170174							-0.113333	1.08172
										-1.02125	2.02968									0.536667	0.689362
										-0.76125	1.69496									0.321667	0.800145
										0.72375	0.605521									-1.53833	2.90459
										0.47875	0.717599
										1.60875	0.327882					-0.771998	0.447719	-0.733201				-1	0.156168
										-0.33125	1.2581
										-0.20125	1.14969
										-0.49625	1.41054
						-1.05599	-0.124583	-1.09019				-1	0.203087
Hembras
						T3_F Vs C_F
Tratamiento	M CT Act	M CT Kita	∆CT			2^(-∆CT)	∆∆CT	2^(-∆∆CT)	Media ∆CT	∆∆CT	2^(-∆∆CT)	Media Geo	Error
C_F_01	26.235	25.59	-0.645			1.56374				-0.852	1.805
C_F_02	24.15	24.93	0.78			0.582367				0.573	0.672217
C_F_03	24.69	23.945	-0.745			1.67597				-0.952	1.93455
C_F_04	24.6	25.385	0.785			0.580352				0.578	0.669892
C_F_05	25.365	25.025	-0.34			1.26576				-0.547	1.46104
C_F_06	23.83	25.955	2.125			0.229251				1.918	0.264621
C_F_07	25.455	25.115	-0.34			1.26576				-0.547	1.46104
C_F_08	24.82	25.065	0.245			0.843816				0.038	0.974004
C_F_09	26.005	25.88	-0.125			1.09051				-0.332	1.25876
C_F_10	25.67	26	0.33			0.795536				0.123	0.918276
Media C_F	25.082	25.289	0.207		Medias/Fold	0.989306			0.207			1	0.1692
T3_F_01	25.965	25.34	-0.625			1.54221				-0.832	1.78015
T3_F_02	26.225	24.41	-1.815			3.5186				-2.022	4.06146
T3_F_03	24.625	24.26	-0.365			1.28788				-0.572	1.48658
T3_F_04	25.685	24.935	-0.75			1.68179				-0.957	1.94127
T3_F_05	25.945	24.96	-0.985			1.97931				-1.192	2.28469
T3_F_06	24.685	24.735	0.05			0.965936				-0.157	1.11497
T3_F_07	25.68	25.07	-0.61			1.52626				-0.817	1.76174
T3_F_08	25.945	25.985	0.04			0.972655				-0.167	1.12272
T3_F_09	25.655	25.48	-0.175			1.12896				-0.382	1.30315
T3_F_10	26.19	24.155	-2.035			4.09823				-2.242	4.73052
Media T3_F	25.66	24.933	-0.727		Medias	1.87018			-0.727
					Fold	1.8904	-0.934	1.91057				1.91057	0.393632
										0.082	0.944747
										1.507	0.351842
										-0.018	1.01255
										1.512	0.350625
										0.387	0.764718
										2.852	0.138504
										0.387	0.764718
										0.972	0.509799
										0.602	0.65884
										1.057	0.48063
												-0.523405	0.0885601
										0.102	0.93174
										-1.088	2.12579
										0.362	0.778085
										-0.023	1.01607
										-0.258	1.19582
										0.777	0.583579
										0.117	0.922103
										0.767	0.587638
										0.552	0.682074
										-1.308	2.47598
						-0.528988	0.934	-0.523405				-1	0.206029

## Sheet: Kitb
						Machos como tratamiento dentro de los controles										T3 vs Controles con independencia del sexo
Tratamiento	M CT Act	M CT Kitb	∆CT			2^(-∆CT)	∆∆CT	2^(-∆∆CT)	Media ∆CT	∆∆CT	2^(-∆∆CT)	Media Geo	Error			2^(-∆CT)	∆∆CT	2^(-∆∆CT)	Media ∆CT	∆∆CT	2^(-∆∆CT)	Media Geo	Error
C_M_01	25.965	30.425	4.46			0.0454366				-0.7485	1.68005					0.0454366				-0.953947	1.93717
C_M_02	25.91	31.625	5.715			0.0190377				0.5065	0.703928					0.0190377				0.301053	0.81166
C_M_03	25.245	30.075	4.83			0.0351581				-0.3785	1.29999					0.0351581				-0.583947	1.49894
C_M_04	25.13	30.82	5.69			0.0193704				0.4815	0.716233					0.0193704				0.276053	0.825848
C_M_05	25.16	30.775	5.615			0.0204041				0.4065	0.754451					0.0204041				0.201053	0.869916
C_M_06	25.92	30.025	4.105			0.0581128				-1.1035	2.14875					0.0581128				-1.30895	2.47761
C_M_07	25.725	32.02	6.295			0.0127355				1.0865	0.470902					0.0127355				0.881053	0.542971
C_M_08	26.105	32.225	6.12			0.0143779				0.9115	0.531632					0.0143779				0.706053	0.612995
C_M_09	24.665	32.615	7.95			0.004044				2.7415	0.149529					0.004044				2.53605	0.172414
Media C_M	25.5361	31.1783	5.64222		Medias/Fold	0.0254086			5.64222			0.740349	0.21377			0.0710511				-1.59895	3.02922
C_F_01	26.235	30.05	3.815			0.0710511				-1.3935	2.62715					0.0132304				0.826053	0.56407
C_F_02	24.15	30.39	6.24			0.0132304				1.0315	0.489201					0.0363979				-0.633947	1.55181
C_F_03	24.69	29.47	4.78			0.0363979				-0.4285	1.34583					0.014082				0.736053	0.60038
C_F_04	24.6	30.75	6.15			0.014082				0.9415	0.520691					0.036272				-0.628947	1.54644
C_F_05	25.365	30.15	4.785			0.036272				-0.4235	1.34118					0.00797666				1.55605	0.34008
C_F_06	23.83	30.8	6.97			0.00797666				1.7615	0.294941					0.0454366				-0.953947	1.93717
C_F_07	25.455	29.915	4.46			0.0454366				-0.7485	1.68005					0.0357726				-0.608947	1.52515
C_F_08	24.82	29.625	4.805			0.0357726				-0.4035	1.32271					0.0459115				-0.968947	1.95741
C_F_09	26.005	30.45	4.445			0.0459115				-0.7635	1.6976					0.0201232				0.221053	0.857939
C_F_10	25.67	31.305	5.635			0.0201232				0.4265	0.744065
Media C_F	25.082	30.2905	5.2085		Medias	0.0326254			5.2085						Medias/Fold	0.0292069			5.41395			1	0.178454
Media C	25.2971	30.7111	5.41395		Fold	0.778797	0.433722	0.740349				1	0.225201			0.098073				-2.06395	4.18129
T3_M_01	26.66	30.01	3.35							-1.18222	2.26926					0.0383402				-0.708947	1.63461
T3_M_02	26.34	31.045	4.705							0.0727778	0.950806					0.00961832				1.28605	0.410071
T3_M_03	24.44	31.14	6.7							-0.812222	1.75591					0.0334929				-0.513947	1.42795
T3_M_04	25.63	30.53	4.9							0.0477778	0.967425					0.0158981				0.561053	0.677807
T3_M_05	23.47	29.445	5.975							-0.0272222	1.01905					0.0297699				-0.343947	1.26922
T3_M_06	26.325	31.395	5.07							-1.53722	2.90235					0.0180733				0.376053	0.770543
T3_M_07	25.25	31.04	5.79							0.652778	0.636054					0.0807721				-1.78395	3.44367
T3_M_08	26.55	30.18	3.63							0.477778	0.718083					0.0243489				-0.0539474	1.0381
Media T3_M	25.5831	30.5981	5.015							2.30778	0.201971					0.0915054				-1.96395	3.90128
T3_F_01	25.965	31.325	5.36									-1	0.288742			0.0351581				-0.583947	1.49894
T3_F_02	26.225	29.675	3.45							-1.82722	3.54853					0.07966				-1.76395	3.39626
T3_F_03	24.625	29.455	4.83							0.597778	0.660771					0.0423939				-0.853947	1.80744
T3_F_04	25.685	29.335	3.65							-0.862222	1.81784					0.0216423				0.116053	0.922709
T3_F_05	25.945	30.505	4.56							0.507778	0.703305					0.0313585				-0.418947	1.33695
T3_F_06	24.685	30.215	5.53							-0.857222	1.81155					0.0281641				-0.263947	1.20076
T3_F_07	25.68	30.675	4.995							1.32778	0.398381					0.0386068				-0.718947	1.64598
T3_F_08	25.945	31.095	5.15							-1.18222	2.26926					0.058517				-1.31895	2.49484
T3_F_09	25.655	30.35	4.695							-0.837222	1.78661
T3_F_10	26.19	30.285	4.095							-1.19722	2.29298				Medias	0.0430774			4.80194
Media T3_F	25.66	30.2915	4.6315							-0.00722222	1.00502				Fold	1.4749	-0.612003	1.52838				1.52838	0.271349
Media T3	25.6258	30.4278	4.80194																	-0.341944	1.26746
						-1.28403	-0.433722	-1.35071				-1.35071	0.304182							0.913056	0.531059
																				0.0280556	0.980741
Machos																				0.888056	0.540342
						T3_M Vs C_M														0.813056	0.569175
Tratamiento	M CT Act	M CT Kitb	∆CT			2^(-∆CT)	∆∆CT	2^(-∆∆CT)	Media ∆CT	∆∆CT	2^(-∆∆CT)	Media Geo	Error							-0.696944	1.62107
C_M_01	25.965	30.425	4.46			0.0454366				-1.18222	2.26926									1.49306	0.355259
C_M_02	25.91	31.625	5.715			0.0190377				0.0727778	0.950806									1.31806	0.401075
C_M_03	25.245	30.075	4.83			0.0351581				-0.812222	1.75591									3.14806	0.112808
C_M_04	25.13	30.82	5.69			0.0193704				0.0477778	0.967425									-0.986944	1.98198
C_M_05	25.16	30.775	5.615			0.0204041				-0.0272222	1.01905									1.43806	0.369064
C_M_06	25.92	30.025	4.105			0.0581128				-1.53722	2.90235									-0.0219444	1.01533
C_M_07	25.725	32.02	6.295			0.0127355				0.652778	0.636054									1.34806	0.392821
C_M_08	26.105	32.225	6.12			0.0143779				0.477778	0.718083									-0.0169444	1.01181
C_M_09	24.665	32.615	7.95			0.004044				2.30778	0.201971									2.16806	0.22251
Media C_M	25.5361	31.1783	5.64222		Medias/Fold	0.0254086			5.64222			1	0.288742							-0.341944	1.26746
T3_M_01	26.66	30.01	3.35			0.098073				-2.29222	4.8981									0.00305556	0.997884
T3_M_02	26.34	31.045	4.705			0.0383402				-0.937222	1.91484									-0.356944	1.28071
T3_M_03	24.44	31.14	6.7			0.00961832				1.05778	0.480371									0.833056	0.561339
T3_M_04	25.63	30.53	4.9			0.0334929				-0.742222	1.67275
T3_M_05	23.47	29.445	5.975			0.0158981				0.332778	0.794006											-0.654288	0.11676
T3_M_06	26.325	31.395	5.07			0.0297699				-0.572222	1.48681									-1.45194	2.73577
T3_M_07	25.25	31.04	5.79			0.0180733				0.147778	0.90264									-0.0969444	1.06951
T3_M_08	26.55	30.18	3.63			0.0807721				-2.01222	4.03403									1.89806	0.268305
Media T3_M	25.5831	30.5981	5.015		Medias	0.0405047			5.015											0.0980556	0.934291
					Fold	1.59414	-0.627222	1.54459				1.54459	0.565017							1.17306	0.443481
										-0.555	1.46917									0.268056	0.830438
										0.7	0.615572									0.988056	0.504157
										-0.185	1.13682									-1.17194	2.25315
										0.675	0.626332									0.558056	0.679217
										0.6	0.659754									-1.35194	2.55256
										-0.91	1.87905									0.0280556	0.980741
										1.28	0.411796									-1.15194	2.22213
										1.105	0.464902									-0.241944	1.18259
										2.935	0.130761									0.728056	0.603717
												-0.647422	0.186938							0.193056	0.874751
										-1.665	3.17114									0.348056	0.785642
										-0.31	1.23971									-0.106944	1.07694
										1.685	0.311003									-0.706944	1.63234
										-0.115	1.08298
										0.96	0.514057					-0.67801	0.612003	-0.654288				-1	0.17754
										0.055	0.962594
										0.775	0.584389
										-1.385	2.61172
						-0.627299	0.627222	-0.647422				-1	0.365804
Hembras
						T3_F Vs C_F
Tratamiento	M CT Act	M CT Kitb	∆CT			2^(-∆CT)	∆∆CT	2^(-∆∆CT)	Media ∆CT	∆∆CT	2^(-∆∆CT)	Media Geo	Error
C_F_01	26.235	30.05	3.815			0.0710511				-1.3935	2.62715
C_F_02	24.15	30.39	6.24			0.0132304				1.0315	0.489201
C_F_03	24.69	29.47	4.78			0.0363979				-0.4285	1.34583
C_F_04	24.6	30.75	6.15			0.014082				0.9415	0.520691
C_F_05	25.365	30.15	4.785			0.036272				-0.4235	1.34118
C_F_06	23.83	30.8	6.97			0.00797666				1.7615	0.294941
C_F_07	25.455	29.915	4.46			0.0454366				-0.7485	1.68005
C_F_08	24.82	29.625	4.805			0.0357726				-0.4035	1.32271
C_F_09	26.005	30.45	4.445			0.0459115				-0.7635	1.6976
C_F_10	25.67	31.305	5.635			0.0201232				0.4265	0.744065
Media C_F	25.082	30.2905	5.2085		Medias/Fold	0.0326254			5.2085			1	0.225201
T3_F_01	25.965	31.325	5.36			0.0243489				0.1515	0.900314
T3_F_02	26.225	29.675	3.45			0.0915054				-1.7585	3.38346
T3_F_03	24.625	29.455	4.83			0.0351581				-0.3785	1.29999
T3_F_04	25.685	29.335	3.65			0.07966				-1.5585	2.94547
T3_F_05	25.945	30.505	4.56			0.0423939				-0.6485	1.56754
T3_F_06	24.685	30.215	5.53			0.0216423				0.3215	0.800237
T3_F_07	25.68	30.675	4.995			0.0313585				-0.2135	1.1595
T3_F_08	25.945	31.095	5.15			0.0281641				-0.0585	1.04138
T3_F_09	25.655	30.35	4.695			0.0386068				-0.5135	1.42751
T3_F_10	26.19	30.285	4.095			0.058517				-1.1135	2.1637
Media T3_F	25.66	30.2915	4.6315		Medias	0.0451355			4.6315
					Fold	1.38345	-0.577	1.49174				1.49174	0.279233
										-0.8165	1.76113
										1.6085	0.327939
										0.1485	0.902188
										1.5185	0.349049
										0.1535	0.899067
										2.3385	0.197716
										-0.1715	1.12623
										0.1735	0.886689
										-0.1865	1.138
										1.0035	0.498788
												-0.670356	0.150965
										0.7285	0.603531
										-1.1815	2.26812
										0.1985	0.871456
										-0.9815	1.97452
										-0.0715	1.05081
										0.8985	0.536444
										0.3635	0.777277
										0.5185	0.698097
										0.0635	0.95694
										-0.5365	1.45045
						-0.722832	0.577	-0.670356				-1	0.187186

## Sheet: MC1R
						Machos como tratamiento dentro de los controles										T3 vs Controles con independencia del sexo
Tratamiento	M CT Act	M CT MC1R	∆CT			2^(-∆CT)	∆∆CT	2^(-∆∆CT)	Media ∆CT	∆∆CT	2^(-∆∆CT)	Media Geo	Error			2^(-∆CT)	∆∆CT	2^(-∆∆CT)	Media ∆CT	∆∆CT	2^(-∆∆CT)	Media Geo	Error
C_M_01	25.965	26.7	0.735			0.600818				-1.623	3.08015					0.600818				-1.31263	2.48394
C_M_02	25.91	27.555	1.645			0.319746				-0.713	1.63921					0.319746				-0.402632	1.32192
C_M_03	25.245	26.535	1.29			0.408951				-1.068	2.09652					0.408951				-0.757632	1.69071
C_M_04	25.13	26.63	1.5			0.353553				-0.858	1.81252					0.353553				-0.547632	1.46168
C_M_05	25.16	27.455	2.295			0.203768				-0.063	1.04464					0.203768				0.247368	0.842432
C_M_06	25.92	27.33	1.41			0.376312				-0.948	1.9292					0.376312				-0.637632	1.55577
C_M_07	25.725	27.305	1.58			0.334482				-0.778	1.71475					0.334482				-0.467632	1.38284
C_M_08	26.105	27.335	1.23			0.426317				-1.128	2.18556					0.426317				-0.817632	1.76251
C_M_09	24.665	28.305	3.64			0.0802141				1.282	0.411225					0.0802141				1.59237	0.331627
Media C_M	25.5361	27.2389	1.70278		Medias/Fold	0.344907			1.70278			1.57486	0.247642			0.360982				-0.577632	1.4924
C_F_01	26.235	27.705	1.47			0.360982				-0.888	1.85061					0.112656				1.10237	0.465751
C_F_02	24.15	27.3	3.15			0.112656				0.792	0.577543					0.296273				-0.292632	1.22487
C_F_03	24.69	26.445	1.755			0.296273				-0.603	1.51887					0.162105				0.577368	0.670185
C_F_04	24.6	27.225	2.625			0.162105				0.267	0.831046					0.366021				-0.597632	1.51323
C_F_05	25.365	26.815	1.45			0.366021				-0.908	1.87644					0.0720429				1.74737	0.297845
C_F_06	23.83	27.625	3.795			0.0720429				1.437	0.369335					0.288172				-0.252632	1.19138
C_F_07	25.455	27.25	1.795			0.288172				-0.563	1.47734					0.113047				1.09737	0.467368
C_F_08	24.82	27.965	3.145			0.113047				0.787	0.579548					0.19751				0.292368	0.81656
C_F_09	26.005	28.345	2.34			0.19751				-0.018	1.01255					0.240649				0.00736842	0.994906
C_F_10	25.67	27.725	2.055			0.240649				-0.303	1.23371
Media C_F	25.082	27.44	2.358		Medias	0.220946			2.358						Medias/Fold	0.279664			2.04763			1	0.130657
Media C	25.2971	27.3447	2.04763		Fold	1.56105	-0.655222	1.57486				1	0.171561			0.90125				-1.89763	3.72601
T3_M_01	26.66	26.81	0.15							-0.967778	1.95583					0.867539				-1.84263	3.58664
T3_M_02	26.34	26.545	0.205							-0.0577778	1.04086					0.200963				0.267368	0.830834
T3_M_03	24.44	26.755	2.315							-0.412778	1.33125					0.358489				-0.567632	1.48209
T3_M_04	25.63	27.11	1.48							-0.202778	1.15091					0.118257				1.03237	0.488907
T3_M_05	23.47	26.55	3.08							0.592222	0.66332					0.501736				-1.05263	2.07431
T3_M_06	26.325	27.32	0.995							-0.292778	1.225					0.592546				-1.29263	2.44974
T3_M_07	25.25	26.005	0.755							-0.122778	1.08883					0.641713				-1.40763	2.65301
T3_M_08	26.55	27.19	0.64							-0.472778	1.38778					0.50874				-1.07263	2.10327
Media T3_M	25.5831	26.7856	1.2025							1.93722	0.261119					0.284204				-0.232632	1.17498
T3_F_01	25.965	26.94	0.975									-1	0.157247			0.151774				0.672368	0.627476
T3_F_02	26.225	28.04	1.815							-0.232778	1.1751					0.460094				-0.927632	1.90215
T3_F_03	24.625	27.345	2.72							1.44722	0.366727					0.366021				-0.597632	1.51323
T3_F_04	25.685	26.805	1.12							0.0522222	0.96445					0.129408				0.902368	0.535008
T3_F_05	25.945	27.395	1.45							0.922222	0.527696					0.404721				-0.742632	1.67323
T3_F_06	24.685	27.635	2.95							-0.252778	1.1915					0.823591				-1.76763	3.40495
T3_F_07	25.68	26.985	1.305							2.09222	0.234519					0.712025				-1.55763	2.9437
T3_F_08	25.945	26.225	0.28							0.0922222	0.938077					0.364755				-0.592632	1.50799
T3_F_09	25.655	26.145	0.49							1.44222	0.368
T3_F_10	26.19	27.645	1.455							0.637222	0.64295				Medias	0.46599			1.34333
Media T3_F	25.66	27.116	1.456							0.352222	0.783377				Fold	1.66625	-0.704298	1.62935				1.62935	0.243432
Media T3	25.6258	26.9692	1.34333																	-0.608333	1.5245
						-0.640596	0.655222	-0.634978				-0.634978	0.108937							0.301667	0.811315
																				-0.0533333	1.03766
Machos																				0.156667	0.897095
						T3_M Vs C_M														0.951667	0.517035
Tratamiento	M CT Act	M CT MC1R	∆CT			2^(-∆CT)	∆∆CT	2^(-∆∆CT)	Media ∆CT	∆∆CT	2^(-∆∆CT)	Media Geo	Error							0.0666667	0.954842
C_M_01	25.965	26.7	0.735			0.600818				-0.967778	1.95583									0.236667	0.848704
C_M_02	25.91	27.555	1.645			0.319746				-0.0577778	1.04086									-0.113333	1.08172
C_M_03	25.245	26.535	1.29			0.408951				-0.412778	1.33125									2.29667	0.203533
C_M_04	25.13	26.63	1.5			0.353553				-0.202778	1.15091									0.126667	0.915945
C_M_05	25.16	27.455	2.295			0.203768				0.592222	0.66332									1.80667	0.285851
C_M_06	25.92	27.33	1.41			0.376312				-0.292778	1.225									0.411667	0.751754
C_M_07	25.725	27.305	1.58			0.334482				-0.122778	1.08883									1.28167	0.41132
C_M_08	26.105	27.335	1.23			0.426317				-0.472778	1.38778									0.106667	0.928731
C_M_09	24.665	28.305	3.64			0.0802141				1.93722	0.261119									2.45167	0.182799
Media C_M	25.5361	27.2389	1.70278		Medias/Fold	0.344907			1.70278			1	0.157247							0.451667	0.731198
T3_M_01	26.66	26.81	0.15			0.90125				-1.55278	2.93381									1.80167	0.286843
T3_M_02	26.34	26.545	0.205			0.867539				-1.49778	2.82407									0.996667	0.501157
T3_M_03	24.44	26.755	2.315			0.200963				0.612222	0.654188									0.711667	0.610614
T3_M_04	25.63	27.11	1.48			0.358489				-0.222778	1.16698
T3_M_05	23.47	26.55	3.08			0.118257				1.37722	0.384959											-0.613741	0.0801898
T3_M_06	26.325	27.32	0.995			0.501736				-0.707778	1.63329									-1.19333	2.2868
T3_M_07	25.25	26.005	0.755			0.592546				-0.947778	1.9289									-1.13833	2.20127
T3_M_08	26.55	27.19	0.64			0.641713				-1.06278	2.08895									0.971667	0.509917
Media T3_M	25.5831	26.7856	1.2025		Medias	0.522812			1.2025											0.136667	0.909618
					Fold	1.51581	-0.500278	1.41449				1.41449	0.330073							1.73667	0.300062
										-0.4675	1.38271									-0.348333	1.27309
										0.4425	0.735858									-0.588333	1.50351
										0.0875	0.941152									-0.703333	1.62826
										0.2975	0.813661									-0.368333	1.29086
										1.0925	0.468948									0.471667	0.721131
										0.2075	0.866037									1.37667	0.385108
										0.3775	0.76977									-0.223333	1.16743
										0.0275	0.981119									0.106667	0.928731
										2.4375	0.184603									1.60667	0.328356
												-0.706971	0.111169							-0.0383333	1.02693
										-1.0525	2.07412									-1.06333	2.08975
										-0.9975	1.99654									-0.853333	1.80667
										1.1125	0.462492									0.111667	0.925518
										0.2775	0.825019
										1.8775	0.272155					-0.60015	0.704298	-0.613741				-1	0.149404
										-0.2075	1.15469
										-0.4475	1.36368
										-0.5625	1.47683
						-0.659715	0.500278	-0.706971				-1	0.233352
Hembras
						T3_F Vs C_F
Tratamiento	M CT Act	M CT MC1R	∆CT			2^(-∆CT)	∆∆CT	2^(-∆∆CT)	Media ∆CT	∆∆CT	2^(-∆∆CT)	Media Geo	Error
C_F_01	26.235	27.705	1.47			0.360982				-0.888	1.85061
C_F_02	24.15	27.3	3.15			0.112656				0.792	0.577543
C_F_03	24.69	26.445	1.755			0.296273				-0.603	1.51887
C_F_04	24.6	27.225	2.625			0.162105				0.267	0.831046
C_F_05	25.365	26.815	1.45			0.366021				-0.908	1.87644
C_F_06	23.83	27.625	3.795			0.0720429				1.437	0.369335
C_F_07	25.455	27.25	1.795			0.288172				-0.563	1.47734
C_F_08	24.82	27.965	3.145			0.113047				0.787	0.579548
C_F_09	26.005	28.345	2.34			0.19751				-0.018	1.01255
C_F_10	25.67	27.725	2.055			0.240649				-0.303	1.23371
Media C_F	25.082	27.44	2.358		Medias/Fold	0.220946			2.358			1	0.171561
T3_F_01	25.965	26.94	0.975			0.50874				-1.383	2.6081
T3_F_02	26.225	28.04	1.815			0.284204				-0.543	1.457
T3_F_03	24.625	27.345	2.72			0.151774				0.362	0.778085
T3_F_04	25.685	26.805	1.12			0.460094				-1.238	2.35871
T3_F_05	25.945	27.395	1.45			0.366021				-0.908	1.87644
T3_F_06	24.685	27.635	2.95			0.129408				0.592	0.663423
T3_F_07	25.68	26.985	1.305			0.404721				-1.053	2.07484
T3_F_08	25.945	26.225	0.28			0.823591				-2.078	4.22221
T3_F_09	25.655	26.145	0.49			0.712025				-1.868	3.65026
T3_F_10	26.19	27.645	1.455			0.364755				-0.903	1.86995
Media T3_F	25.66	27.116	1.456		Medias	0.420533			1.456
					Fold	1.90333	-0.902	1.86865				1.86865	0.357913
										0.014	0.990343
										1.694	0.309069
										0.299	0.812816
										1.169	0.444729
										-0.006	1.00417
										2.339	0.197647
										0.339	0.790589
										1.689	0.310142
										0.884	0.541863
										0.599	0.660211
												-0.535144	0.0918099
										-0.481	1.39571
										0.359	0.779705
										1.264	0.416388
										-0.336	1.26225
										-0.006	1.00417
										1.494	0.355027
										-0.151	1.11034
										-1.176	2.25949
										-0.966	1.95342
										-0.001	1.00069
						-0.525394	0.902	-0.535144				-1	0.191535

[truncated: 6 more sheets: MITFa, Slc24a5, Sox10, TYR, TYRP1a, TYRP1b]
